## Essential role of CFAP53 in sperm flagellum biogenesis

Bingbing Wu<sup>1,8#</sup>, Xiaochen Yu<sup>2,3,4,5,6#</sup>, Chao Liu<sup>1</sup>, Lina Wang<sup>9</sup>, Tao Huang<sup>2,3,4,5,6</sup>, Gang

Lu<sup>2,3,4,5,6,7</sup>, Zi-Jiang Chen<sup>2,3,4,5,6,7</sup>, Wei Li<sup>1,8\*</sup>, Hongbin Liu<sup>2,3,4,5,6,7\*</sup>

<sup>1</sup> State Key Laboratory of Stem Cell and Reproductive Biology, Institute of Zoology, Chinese Academy of Sciences, Beijing 100101, China

<sup>2</sup>Center for Reproductive Medicine, Cheeloo College of Medicine, Shandong University, Jinan, Shandong, 250012, China

<sup>3</sup>Key laboratory of Reproductive Endocrinology of the Ministry of Education, Shandong University, Jinan, Shandong, 250012, China

<sup>4</sup>Shandong Key Laboratory of Reproductive Medicine, Jinan, Shandong, 250012, China

<sup>5</sup>Shandong Provincial Clinical Research Center for Reproductive Health, Jinan, Shandong, 250012, China

<sup>6</sup>National Research Center for Assisted Reproductive Technology and Reproductive Genetics, Shandong University, Jinan, Shandong, 250012, China

<sup>7</sup>CUHK-SDU Joint Laboratory on Reproductive Genetics, School of Biomedical Sciences, the Chinese University of Hong Kong, Hong Kong 999077, China<sup>8</sup>College of Life Sciences, University of Chinese Academy of Sciences, Beijing 100049, China

<sup>9</sup>China National Clinical Research Center of Respiratory Diseases; Respiratory Department of Beijing Children's Hospital, Capital Medical University; National Center for Children's Health, China

# These authors contributed equally to this work.

\*Corresponding Authors:

Dr. Wei Li

leways@ioz.ac.cn

Dr. Hongbin Liu

hongbin\_sduivf@aliyun.com

27 **Keywords:** male infertility, flagellum, CFAP53, intramanchette transport, intraflagellar

28 transport

29 **Abstract**

30 The sperm flagellum is essential for male fertility. Despite vigorous research progress towards

31 understanding the pathogenesis of flagellum-related diseases, much remains unknown about

32 the mechanisms underlying the flagellum biogenesis itself. Here, we show that the cilia and

33 flagella associated protein 53 (*Cfap53*) gene is predominantly expressed in testes, and it is

34 essential for sperm flagellum biogenesis. The knockout of this gene resulted in complete

35 infertility in male mice but not in the females. CFAP53 localized to the manchette and sperm

36 tail during spermiogenesis, the knockout of this gene impaired flagellum biogenesis.

37 Furthermore, we identified two manchette and sperm tail-associated proteins that interacted

38 with CFAP53 during spermiogenesis. The disruption of *Cfap53* decreased the expression level

39 of these two proteins and disrupted their localization in spermatids. Together, our results

40 suggest that CFAP53 is an essential protein for sperm flagellum biogenesis, and its mutations

41 might be associated with MMAF.

42

43

44

45

46

47

48

49 **Introduction**

50 Infertility is a widespread human health issue, affecting 10%–15% of couples worldwide, and  
51 male factors account for around 50% of these cases (Boivin et al., 2007; Tüttelmann et al.,  
52 2018). Male infertility is clinically diagnosed as azoospermia, decreased sperm concentration  
53 (oligozoospermia), reduced percentage of morphologically normal sperm (teratozoospermia),  
54 or lower sperm motility (asthenozoospermia) (Coutton et al., 2015; Ray et al., 2017; Tüttelmann  
55 et al., 2018; Zinaman et al., 2000). Spermatozoa are polarized cells composed of two main parts,  
56 the head and the flagellum. The flagellum makes up about 90% of the length of the sperm and  
57 is essential for sperm motility (Burgess et al., 2003; Mortimer, 2018), and it contains axoneme  
58 and peri-axonemal structures, such as the mitochondrial sheath, outer dense fibers, and the  
59 fibrous sheath (Mortimer, 2018), and the presence of these structures allows the flagellum to  
60 be divided into the connecting piece, midpiece, principal piece, and endpiece (M. S. Lehti & A.  
61 Sironen, 2017). Defects in formation of the flagellum disrupt sperm morphology and motility,  
62 leading to male infertility (Chemes & Rawe, 2010; Sironen et al., 2020; Turner et al., 2020).  
63 Great progress has been made in our understanding of the pathogenesis of flagella-related  
64 diseases in recent years, but the pathogenic genes and mechanisms of flagellum biogenesis are  
65 far from being fully understood.

66 The flagellum needs to be integrated with the head in order to function properly during  
67 fertilization, and a very complex structure called the sperm head-tail coupling apparatus (HTCA)  
68 is necessary for the integration of the sperm head and the flagellum, and defects in this structure  
69 result in acephalic spermatozoa syndrome (Wu et al., 2020). Recently, *SUN5*, *PMFBP1*,

70 *HOOK1*, *BRDT*, *TSGA10*, and *CEP112* have been found to be involved in the assembly of the  
71 HTCA, and mutations in these genes are associated with acephalic spermatozoa syndrome  
72 (Chen et al., 2018; Li et al., 2017; Sha, Wang, et al., 2020; Sha et al., 2018; Shang et al., 2018;  
73 Zhu et al., 2018; Zhu et al., 2016). Abnormalities of the axoneme and accessory structures  
74 mainly result in asthenozoospermia, which is associated with morphological flagellar defects  
75 such as abnormal tails, irregular mitochondrial sheaths, and irregular residual cytoplasm  
76 (Escalier & Touré, 2012; Tu et al., 2020). Previous studies have identified several flagella-  
77 associated genes, including *AKAP3*, *AKAP4*, *TTC21A*, *TTC29*, *FSIP2*, *DNAH1*, *DNAH2*,  
78 *DNAH6*, *DNAH8*, *DNAH17*, and *DZIP1*, that are involved in sperm flagellum biogenesis (Ben  
79 Khelifa et al., 2014; Y. Li et al., 2019; C. Liu et al., 2019; C. Liu et al., 2020; W. Liu et al.,  
80 2019; Lv et al., 2020; Martinez et al., 2018; Sha, Wei, et al., 2020; Tu et al., 2019; Turner et al.,  
81 2001). Mutations in these genes cause multiple morphological abnormalities of the flagella  
82 (MMAF), which is characterized as sperm without flagella or with short, coiled, or otherwise  
83 irregular flagella (Ben Khelifa et al., 2014; Touré et al., 2020). There are two evolutionarily  
84 conserved bidirectional transport platforms that are involved in sperm flagellum biogenesis,  
85 including intramanchette transport (IMT) and intraflagellar transport (IFT) (Kierszenbaum,  
86 2001, 2002; San Agustin et al., 2015). IMT and IFT share similar cytoskeletal components,  
87 namely microtubules and F-actin, that provide tracks for the transport of structural proteins to  
88 the developing tail (Abraham L. Kierszenbaum et al., 2011), and mutations in *TTC21A*, *TTC29*,  
89 *SPEF2*, and *CFAP69*, which have been reported to disrupt sperm flagellar protein transport,  
90 also lead to MMAF (Dong FN, 2018; C. Liu et al., 2019; Chunyu Liu et al., 2020; W. Liu et al.,  
91 2019; Sha et al., 2019).

92 The cilia and flagella associated protein (CFAP) family, such as *CFAP58*, *CFAP61*,  
93 *CFAP69*, *CFAP65*, *CFAP43*, *CFAP44*, *CFAP70*, and *CFAP251*, is associated with flagellum  
94 biogenesis and morphogenesis (Beurois et al., 2019; Dong FN, 2018; He et al., 2020; Huang et  
95 al., 2020; W. Li et al., 2019; Li et al., 2020; Tang et al., 2017). Previous studies have indicated  
96 that the functional role of CFAP53 (also named the coiled-coil domain containing protein  
97 CCDC11) is involved in the biogenesis and motility of motile cilia (Narasimhan et al., 2015;  
98 Noël et al., 2016; Perles et al., 2012; Silva et al., 2016), and CFAP53 is localized not only to  
99 the base of the nodal cilia, but also along the axoneme of the tracheal cilia (Ide et al., 2020).  
100 However, the exact localization and function of CFAP53 during spermiogenesis is still poorly  
101 understood. In the present study, we used a *Cfap53* knockout mouse model to study the  
102 underlying mechanism of CFAP53 in sperm flagellum biogenesis. We demonstrated that  
103 CFAP53 is localized to the manchette and the sperm tail of spermatids, and we found that  
104 depletion of CFAP53 led to defects in sperm flagellum biogenesis and sperm head shaping.  
105 Moreover, we identified two proteins that interacted with CFAP53 during spermiogenesis,  
106 namely intraflagellar transport protein 88 (IFT88) and coiled-coil domain containing 42  
107 (CCDC42). *Cfap53* knockout reduced the accumulation of both IFT88 and CCDC42 and  
108 disrupted the localization of IFT88 in spermatids. Thus, in addition to uncovering the essential  
109 role of CFAP53 in sperm flagellum biogenesis, we also show that CFAP53 might participate  
110 in the biogenesis of the sperm flagellum by collaborating with the IMT and IFT pathways.

111

112

113 **Results**

114 ***Cfap53* knockout leads to male infertility**

115 To identify the biological function of CFAP53, we first examined its expression pattern in  
116 different tissues and found that it was predominantly expressed in testis (Fig. 1A). Further  
117 immunoblotting of mouse testis lysates prepared from different days after birth was carried out.  
118 CFAP53 was first detected in testis at postnatal day 7 (P7), and the level increased continuously  
119 from postnatal P14 onward, with the highest levels detected in adult testes (Fig. 1B). This time  
120 course corresponded with the onset of meiosis, suggesting that CFAP53 might have an essential  
121 role in spermatogenesis.

122 To characterize the potential functions of CFAP53 during spermatogenesis, *Cfap53*<sup>-/-</sup> mice  
123 were created using the CRISPR-Cas9 system from Cyagen Biosciences. Exon 4 to exon 6 of  
124 the *Cfap53* gene was selected as the target site (Fig. 1C). The founder animals were genotyped  
125 by genomic DNA sequencing and further confirmed by polymerase chain reaction – the total  
126 size of the *Cfap53* locus in *Cfap53*<sup>+/+</sup> mice was 918 bp, while the size of the locus in *Cfap53*<sup>-/-</sup>  
127 mice was 630 bp (Fig. 1D). Immunoblotting of testis indicated that the CFAP53 protein was  
128 successfully eliminated in *Cfap53*<sup>-/-</sup> mice (Fig. 1H). Because we cannot obtain adult  
129 homozygous *Cfap53*<sup>-/-</sup> mice in the C57BL/6J (C57) background, the heterozygous *Cfap53*  
130 mutated mice in the C57 background were further crossed with wild-type (WT) ICR mice, and  
131 the resulting heterozygotes were interbred to obtain homozygous *Cfap53*<sup>-/-</sup> mice in the  
132 C57/ICR background. The offspring genotypes deviated from Mendelian ratios (115:237:60 for  
133 *Cfap53*<sup>+/+</sup>:*Cfap53*<sup>+/-</sup>:*Cfap53*<sup>-/-</sup>), suggesting an increased prenatal lethal rate in *Cfap53*<sup>-/-</sup> mice.  
134 We analyzed 25 *Cfap53*<sup>-/-</sup> mice, and 48% (12/25) of them presented with situs inversus totalis

135 (SIT) and nearly 8% (2/25) had situs inversus abdominalis (SIA). In addition, 32% (8/25) of  
136 the *Cfap53*<sup>-/-</sup> mice developed hydrocephalus (Supplementary Fig. 1).

137 A total of 72% (43/60) of the *Cfap53*<sup>-/-</sup> mice that survived after birth died within 6 weeks,  
138 while 25% (15/60) of the *Cfap53*<sup>-/-</sup> mice lived longer than 8 weeks of age (Fig. 1E). We further  
139 examined the fertility of *Cfap53* male and female knockout mice. *Cfap53* male knockout mice  
140 exhibited normal mounting behaviors and produced coital plugs, but *Cfap53*<sup>-/-</sup> male mice failed  
141 to produce any offspring after mating with WT adult female mice. In contrast, *Cfap53*<sup>-/-</sup> female  
142 mice generated offspring after mating with WT males (Fig. 1F–G). Thus, the disruption in  
143 *Cfap53* resulted in male infertility but did not affect the fertility of *Cfap53*<sup>-/-</sup> female mice.

#### 144 **The knockout of *Cfap53* results in MMAF**

145 To further investigate the cause of male infertility, we first observed the adult *Cfap53*<sup>-/-</sup> testis  
146 structure at both the gross and histological levels. The body weight of *Cfap53*<sup>-/-</sup> male mice was  
147 reduced compared to *Cfap53*<sup>+/+</sup> male mice (Fig. 1J), while there were no significant differences  
148 in the testis size, testis weight, or testis/body weight ratio between *Cfap53*<sup>-/-</sup> and *Cfap53*<sup>+/+</sup>  
149 male mice (Fig. 1I, K, L). We then observed the transverse sections of the *Cfap53*<sup>-/-</sup> cauda  
150 epididymis by hematoxylin and eosin (H&E) staining and found that there was a complete lack  
151 of spermatozoa or only a few spermatozoa in the epididymal lumen of *Cfap53*<sup>-/-</sup> mice (Fig. 2A,  
152 red arrowhead). We examined the spermatozoa released from the caudal epididymis and found  
153 the sperm count in the *Cfap53*<sup>-/-</sup> mice to be significantly decreased compared with WT mice  
154 (Fig. 2B). To determine the morphological characteristics of the spermatozoa, we performed  
155 single-sperm immunofluorescence of lectin peanut agglutinin (PNA), which is used to visualize  
156 the acrosomes of spermatozoa. The *Cfap53*<sup>-/-</sup> caudal epididymis only contained malformed

157 spermatozoa exhibiting the prominent MMAF phenotype of short, coiled, or absent flagella  
158 compared with *Cfap53*<sup>+/+</sup> mice. In addition to the flagella abnormality, *Cfap53*<sup>-/-</sup> mice had  
159 abnormal sperm heads (Fig. 2C). The ratio of spermatozoa with abnormal heads and flagella is  
160 shown in Fig. 2D. Abnormal sperm head with short tail and normal sperm head with curly tail  
161 were the major defect categories. Immunofluorescence analysis with MitoTracker, which is  
162 used to visualize mitochondria, showed that the mitochondrial sheath was malformed in the  
163 *Cfap53*<sup>-/-</sup> spermatozoa (Supplementary Fig. 2).

#### 164 **CFAP53 is required for spermatogenesis**

165 To address the question of why *Cfap53* knockout results in MMAF, we conducted Periodic  
166 acid-Schiff (PAS) staining to determine the stages of spermatogenesis in *Cfap53*<sup>-/-</sup> and WT  
167 testes. The most prominent defects were observed in the spermatids at the stages of  
168 spermatogenesis, where abnormally elongated and constricted sperm head shapes were  
169 identified (Fig. 3A, asterisks). In addition, some dead cells could be detected in the *Cfap53*<sup>-/-</sup>  
170 seminiferous tubules (Fig. 3A). To clarify the detailed morphological effects of the *Cfap53*  
171 mutation on the structure of sperm heads, we analyzed the process of sperm head shaping  
172 between *Cfap53*<sup>-/-</sup> and *Cfap53*<sup>+/+</sup> mice. Notably, from step 1 to step 8 the acrosome and nucleus  
173 morphology in *Cfap53*<sup>-/-</sup> spermatids was normal compared with *Cfap53*<sup>+/+</sup> spermatids. Head  
174 shaping started at step 9 to step 10, and the morphology of the elongated *Cfap53*<sup>-/-</sup> spermatid  
175 heads was normal compared with that of *Cfap53*<sup>+/+</sup> mice, whereas abnormal club-shaped heads  
176 (Fig. 3B) were seen in step 11 spermatids in *Cfap53*<sup>-/-</sup> mice. This phenomenon became more  
177 apparent between step 11 and step 16 (Fig. 3B). Taken together, these results indicate that  
178 CFAP53 is required for normal spermatogenesis.



179 H&E staining was used to further observe the morphological changes of the seminiferous  
180 tubules. The seminiferous tubules of *Cfap53*<sup>+/+</sup> mice had a tubular lumen with flagella  
181 appearing from the developing spermatids. In contrast, the flagella were absent in the  
182 seminiferous tubules of *Cfap53*<sup>-/-</sup> mice (Fig. 4A). Immunofluorescence staining for  $\alpha/\beta$ -tubulin,  
183 the specific flagellum marker, further confirmed the defects in flagellum biogenesis resulting  
184 from the knockout of *Cfap53* (Fig. 4B). These observations clearly suggest that CFAP53 plays  
185 an important role in flagellum biogenesis.

### 186 **CFAP53 is required for sperm flagellum biogenesis and correct manchette function**

187 In order to determine the causes of the abnormal sperm morphology in *Cfap53*<sup>-/-</sup> mice, we  
188 investigated the effect of *Cfap53* knockout on flagellum biogenesis using the antibody against  
189 acetylated tubulin, a flagellum-specific marker. Unlike the well-defined flagellum of the control  
190 group, the axoneme was absent in step 2–3 spermatids in *Cfap53*<sup>-/-</sup> mice (Fig. 4C, asterisks).  
191 In steps 4–6, abnormally formed flagella were seen in *Cfap53*<sup>-/-</sup> testis sections (Fig. 4C). The  
192 presence of long and abnormal spermatid heads suggested defects in the function of the  
193 manchette, which is involved in sperm head shaping. Immunofluorescence staining for  $\alpha/\beta$ -  
194 tubulin antibody showed that manchette formation was normal in step 8 to step 10 spermatids  
195 in *Cfap53*<sup>-/-</sup> mice, while step 11 to step 13 spermatids of *Cfap53*<sup>-/-</sup> mice had abnormally long  
196 manchettes compared with WT controls. (Fig. 4D). We performed transmission electron  
197 microscopy to study the organization of the sperm manchette in detail in *Cfap53*<sup>-/-</sup> mice. During  
198 the chromatin condensation period starting from step 11 spermatids, the manchette of *Cfap53*<sup>-/-</sup>  
199 mice appeared abnormally long and the perinuclear ring constricted the sperm nucleus,  
200 causing severe defects in sperm head formation (Fig. 4E). Thus, deletion of *Cfap53* causes

201 severe defects in sperm flagellum biogenesis and manchette function.

## 202 **CFAP53 localizes to the manchette and the sperm tail**

203 In order to determine the functional role of CFAP53 during spermiogenesis, we investigated  
204 the subcellular localization of CFAP53 during spermatogenesis in mice using an anti-CFAP53  
205 antibody. The CFAP53 signal was first observed as two adjacent dots nearby the nucleus in  
206 spermatocytes and early round spermatids (Fig. 5A), and these results were consistent with the  
207 protein expression patterns (Fig. 1B). During the elongation of the spermatids (step 9 to step  
208 14), CFAP53 could be detected as a skirt-like structure that encircled the elongating spermatid  
209 head, and the protein was subsequently located to the sperm tail around step 14 to step 15.  
210 Compared to *Cfap53*<sup>+/+</sup> mice, there was no CFAP53 staining detected in the germ cells of  
211 *Cfap53*<sup>-/-</sup> male mice (Fig. 5A). To determine whether CFAP53 associates with microtubular  
212 structures, the localization of CFAP53 in the elongating and elongated spermatid was  
213 subsequently co-stained with antibodies against  $\alpha$ -tubulin (a manchette marker) and against  
214 CFAP53. In the elongating spermatid CFAP53 colocalized with the manchette microtubules.  
215 CFAP53 was further identified at the sperm tail, whereas  $\alpha$ -tubulin marked the whole tail in the  
216 elongated spermatids (Fig. 5B). Taken together, these results indicate that CFAP53 might  
217 participate in manchette formation and flagellum biogenesis.

## 218 **CFAP53 interacts with IFT88 and CCDC42**

219 Sperm flagellum biogenesis requires protein delivery to the assembly sites via IMT and IFT  
220 (Lehti & Sironen, 2016). According to the localization and functional role of CFAP53 during  
221 spermiogenesis, some IFT/IMT-related genes were chosen to determine their interactions with

222 CFAP53 by coimmunoprecipitation (co-IP) assays. IFT88 and IFT20, which belong to the IFT  
223 family, are involved in protein transport, and their depletion affects sperm flagellum biogenesis  
224 (A. L. Kierszenbaum et al., 2011; Zhang et al., 2016). CCDC42 is involved in IMT and is  
225 essential for sperm flagellum biogenesis (Pasek et al., 2016; Tapia Contreras & Hoyer-Fender,  
226 2019). To determine their relationship with CFAP53, HEK293T cells were co-transfected with  
227 MYC-tagged CFAP53 and IFT88-GFP, CCDC42-GFP, or GFP-tagged empty vector plasmid  
228 as a control, and we found that both IFT88 and CCDC42 were coimmunoprecipitated with  
229 CFAP53-MYC (Fig. 6A-C). We did not detect any interaction between IFT20-FLAG and  
230 CFAP53-MYC using the same strategy (Fig. 6D). To further determine their relationship, we  
231 performed immunoblotting of IFT88 and CCDC42 in the testes of *Cfap53*<sup>+/+</sup> and *Cfap53*<sup>-/-</sup>  
232 mice, and we found that the expression levels of IFT88 and CCDC42 were significantly  
233 reduced in the testes of *Cfap53*<sup>-/-</sup> mice (Fig. 6E, F). Taken together, we show that CFAP53  
234 interacts with IFT88 and CCDC42 and that the knockout of *Cfap53* decreases the expression  
235 of CCDC42 and IFT88.

236 Both IFT88 and CCDC42 localize to the manchette, the sperm connecting piece, and the  
237 sperm tail during spermatogenesis (A. L. Kierszenbaum et al., 2011; Pasek et al., 2016; Tapia  
238 Contreras & Hoyer-Fender, 2019). Because the antibody against CCDC42 does not function  
239 for immunofluorescence, we focused on IFT88. Similar to the knockout of *Cfap53*,  
240 spermatozoa in the *Ift88* mutant mouse had absent, short, or irregular tails with malformed  
241 sperm heads (A. L. Kierszenbaum et al., 2011; San Agustin et al., 2015). In order to further  
242 investigate the effect of *Cfap53* knockout on IFT88 localization and its potential interaction  
243 with CFAP53 during sperm development, we co-stained the differentiating spermatids with

244 antibodies against IFT88 and CFAP53. We found that IFT88 located to the manchette, the  
245 HTCA, and the sperm tail as previously reported (A. L. Kierszenbaum et al., 2011; San  
246 Agustin et al., 2015). CFAP53 co-localized with IFT88 in the manchette of the elongating  
247 spermatid and in the sperm tail of the elongated spermatid (Fig. 6G). We next detected IFT88  
248 localization in the different steps of spermatid development in *Cfap53<sup>+/+</sup>* and *Cfap53<sup>-/-</sup>* mice.  
249 The IFT88 signal was first observed in the tail of round spermatids and continued to be detected  
250 in the elongated spermatid. Unlike the well-defined flagellum signal of the control group, the  
251 detectable IFT88 signal was abnormal in the spermatids of *Cfap53<sup>-/-</sup>* mice (Fig. 6H). This result  
252 suggests that both CFAP53 and IFT88 might cooperatively participate in flagellum biogenesis  
253 during spermiogenesis.

## 254 **Discussion**

255 In this study, we have identified the essential role of CFAP53 in spermatogenesis and male  
256 fertility by generating *Cfap53<sup>-/-</sup>* mice with the deletion of exons 4–6. Sperm flagellum  
257 biogenesis begins in early round spermatids, where the axoneme extends from the distal  
258 centriole (Mari S Lehti & Anu Sironen, 2017). It has been reported that the expression of many  
259 genes that are necessary for sperm flagellum biogenesis is significantly increased at  
260 approximately 12 days after birth (Horowitz et al., 2005), and we found that CFAP53  
261 expression was upregulated in the testes between 7 and 14 days after birth (Fig. 1B), which was  
262 consistent with the timing of axoneme formation. Previous studies have shown that CFAP53 is  
263 located at the basal body and on centriolar satellites in retinal pigment epithelial cells and on  
264 the ciliary axonemes in zebrafish kidneys and human respiratory cells (Narasimhan et al., 2015;

265 Silva et al., 2016). In mice, CFAP53 is located at the base of the nodal cilia and the tracheal  
266 cilia, as well as along the axonemes of the tracheal cilia (Ide et al., 2020). Depletion of CFAP53  
267 disrupts the subcellular organization of satellite proteins and lead to primary cilium assembly  
268 abnormalities (Silva et al., 2016), and knockout of CFAP53 disrupts ciliogenesis in human  
269 tracheal epithelial multiciliated cells, in *Xenopus* epidermal multiciliated cells, and in zebrafish  
270 Kupffer's vesicle and pronephros (Narasimhan et al., 2015; Noël et al., 2016; Silva et al., 2016).  
271 The mammalian sperm flagellum contains an axoneme composed of a 9+2 microtubule  
272 arrangement, which is similar to that of motile cilia. Our study further showed that axoneme  
273 formation was impaired in early round spermatids in *Cfap53*<sup>-/-</sup> mice (Fig. 4C), thus  
274 demonstrating that CFAP53 is essential for sperm flagellum biogenesis.

275 We found that CFAP53 localized on the manchette and tail during spermiogenesis, and it  
276 could interact with IFT88 and CCDC42, both of which colocalized to the same positions during  
277 spermiogenesis (Fig. 6A, B, G). In addition, it has been reported that CFAP53 also interacts  
278 with KIF3A in adult testis (Lehti et al., 2013). All of these partner proteins are related to  
279 manchette and flagellum biogenesis, with the manchette being one of the transient skirt-like  
280 microtubular structures that are required for the formation of sperm flagella and the shaping of  
281 the head during spermatid elongation (Kierszenbaum & Tres, 2004; Lehti & Sironen, 2016). It  
282 has been proposed that flagellar structure proteins and motor proteins are transported through  
283 the manchette via IMT to the base of the sperm flagellum and via IFT to the developing sperm  
284 flagellum (Abraham L. Kierszenbaum et al., 2011; Lehti & Sironen, 2016). Both IMT and IFT  
285 provide the bidirectional movement of multicomponent transport systems powered by  
286 molecular motors along the microtubules, and both are essential for axoneme assembly (Mari

287 S Lehti & Anu Sironen, 2017). Molecular motors (kinesin-2 and dynein 2) move cargo proteins  
288 associated with protein rafts consisting of IFT proteins (Chien et al., 2017; Kierszenbaum, 2002;  
289 Zhu et al., 2020), and KIF3A, the motor subunit of kinesin-2, works as an anterograde motor  
290 for transporting IFT complex B during the development of the sperm tail (Lehti et al., 2013;  
291 Marszalek JR, 1999). KIF3A localizes to the manchette, the basal body, and the axoneme of  
292 spermatids, and disruption of KIF3A affects the formation of the manchette and further disrupts  
293 the delivery of proteins to the sperm tail (Lehti et al., 2013). IFT88 is an IFT complex B protein  
294 that is regarded as a member of the IMT machinery. Notably, the reproductive phenotype of  
295 *Ift88* knockout male mice was similar to what we observed in *Cfap53* knockout mice (San  
296 Agustin et al., 2015). Thus, CFAP53 might function in collaboration with IFT88 and KIF3A in  
297 flagellum biogenesis via IMT and IFT (Fig. 7).

298 Previous studies have shown that *Ccdc42* knockout male mice have abnormal head shapes  
299 and axoneme assembly defects, and it was speculated that CCDC42 might be a passenger  
300 protein transported via the manchette towards the developing tail (Pasek et al., 2016; Tapia  
301 Contreras & Hoyer-Fender, 2019). As a partner protein of CCDC42 and IFT88, once CFAP53  
302 was depleted the expression levels of these two partner proteins were also decreased  
303 significantly (Fig 6E, F). These results raise the question of whether CFAP53 works as a cargo  
304 protein or as a component of the IFT and IMT machineries. Given that CFAP53 also localized  
305 on sperm flagella, we are drawn to the conclusion that CFPA53 works as a cargo protein and  
306 that and it might be involved in the stabilization of other cargo proteins, such as CCDC42, that  
307 are transported by IFT and IMT (Fig 7). As for the decreasing of IFT88, this is likely caused by  
308 the decreasing demand for cargo protein transportation via IMT and IFT to the developing

309 sperm tail. Accordingly, our current conclusions can be further expanded to other flagellum-  
310 associated proteins, and the depletion of some cargo proteins that need to be transported by  
311 either IMT or IFT should have similar phenotypes due to flagellum biogenesis defects, and at  
312 least some of the MMAF might be caused by this mechanism.

## 313 **Methods**

### 314 **Animals**

315 The mouse *Cfap53* gene (Transcript: ENSMUSG00000035394) is 96.90 kb and contains 8  
316 exons and is located on chromosome 18. Exon 4 to exon 6 was chosen as the target site, and  
317 *Cfap53*<sup>-/-</sup> mice were generated using the CRISPR-Cas9 system from Cyagen Biosciences. The  
318 gRNA and Cas9 mRNA were co-injected into fertilized eggs of C57BL/6 mice to generate a  
319 targeted line with a 3243 bp base deletion, AAG GTT TGA TCC GAA GTC AT – 3243 bp –  
320 CAA GGT TTA AGA ACA GTG TG. The founder animals were genotyped by genomic DNA  
321 sequencing. For *Cfap53*<sup>-/-</sup> mice, the specific primers were Forward: 5'-GAG GGA ATA GGT  
322 TTC TGG GTA GGT G-3' and Reverse: 5'-ACC CTT CTG GTC CCT CAG TCA TCT-3',  
323 yielding a 630 bp fragment. For *Cfap53* wild-type mice, the specific primers were Forward: 5'-  
324 GAG GGA ATA GGT TTC TGG GTA GG TG-3' and Reverse: 5'-AGC AGC AGT GAA ACT  
325 TCA AAC ATG G-3', yielding a 918 bp fragment. All of the animal experiments were  
326 performed according to approved institutional animal care and use committee (IACUC)  
327 protocols (#08-133) of the Institute of Zoology, Chinese Academy of Sciences.

### 328 **Plasmids**

329 Mouse *Cfap53* was obtained from mouse testis cDNA and cloned into the pCMV-Myc vector  
330 using the Clon Express Ultra One Step Cloning Kit (C115, Vazyme). Mouse *Ccdc42* and *Ift88*

331 were obtained from mouse testis cDNA and cloned into the pEGFP-C1 vector using the Clon  
332 Express Ultra One Step Cloning Kit (C115, Vazyme). Mouse *Ift20* was obtained from mouse  
333 testis cDNA and cloned into the pRK vector using the Clon Express Ultra One Step Cloning  
334 Kit (C115, Vazyme).

### 335 **Antibodies**

336 Mouse anti-CFAP53 polyclonal antibody (aa 216–358) was generated by Quan Biotech (Wuhan,  
337 China) and was used at a 1:10 dilution for immunofluorescence and 1:200 dilution for western  
338 blotting. Mouse anti-GFP antibody (1:1000 dilution, M20004L, Abmart, Shanghai, China),  
339 rabbit anti-MYC antibody (1:1000 dilution, BE2011, EASYBIO, Beijing, China), mouse anti-  
340 FLAG antibody (1:1000 dilution, F1804, Sigma, Shanghai, China), and rabbit anti-CCDC42  
341 antibody (1:500 dilution, abin2785068, antibodies-online, Beijing, China) were used for  
342 western blotting. Rabbit anti- $\alpha$ -tubulin antibody (AC007, ABclonal, Wuhan, China) was used  
343 at a 1:100 dilution for immunofluorescence and at a 1:10000 dilution for western blotting.  
344 IFT88 polyclonal antibody (13967-1-AP, Proteintech, Wuhan, China) was used at a 1:50  
345 dilution for immunofluorescence and at a 1:1000 dilution for western blotting. Mouse anti- $\alpha/\beta$ -  
346 tubulin antibody (1:100, ab44928, Abcam, Shanghai, China) and mouse anti-acetylated- $\alpha$ -  
347 tubulin antibody (T7451, 1:1000 dilution, Sigma) were used for immunofluorescence. The  
348 secondary antibodies were goat anti-rabbit FITC (1:200, ZF-0311, Zhong Shan Jin Qiao,  
349 Beijing, China), goat anti-rabbit TRITC (1:200 dilution, ZF-0316, Zhong Shan Jin Qiao), goat  
350 anti-mouse FITC (1:200 dilution, ZF-0312, Zhong Shan Jin Qiao), and goat anti-mouse TRITC  
351 (1:200 dilution, ZF-0313, Zhong Shan Jin Qiao). The Alexa Fluor 488 conjugate of lectin PNA  
352 (1:400 dilution, L21409, Thermo Fisher Scientific, Shanghai, China) and MitoTracker Deep



353 Red 633 (1:1500 dilution, M22426, Thermo Fisher Scientific) were used for  
354 immunofluorescence.

### 355 **Immunoprecipitation**

356 Transfected HEK293T cells were lysed in ELB buffer (50 mM HEPES, 250 mM NaCl, 0.1%  
357 NP-40, 1 mM PMSF, and complete EDTA-free protease inhibitor cocktail (Roche)) for 30 min  
358 on ice and centrifuged at  $12000 \times g$  for 15 min. For immunoprecipitation, cell lysates were  
359 incubated with anti-GFP antibody overnight at 4°C and then incubated with protein A-  
360 Sepharose (GE, 17-1279-03) for 3 hours at 4°C Thereafter, the precipitants were washed four  
361 times with ELB buffer, and the immune complexes were eluted with sample buffer containing  
362 1% SDS for 10 min at 95°C and analyzed by immunoblotting.

### 363 **Immunoblotting**

364 Proteins obtained from lysates or immunoprecipitates were separated by SDS-PAGE and  
365 electrotransferred onto a nitrocellulose membrane. The membrane was blocked in 5% skim  
366 milk (BD, 232100) and then incubated with corresponding primary antibodies and detected by  
367 Alexa Fluor 680 or 800-conjugated goat anti-mouse or Alexa Fluor 680 or 800-conjugated goat  
368 anti-rabbit secondary antibodies. Finally, they were scanned using the ODYSSEY Sa Infrared  
369 Imaging System (LI-COR Biosciences, Lincoln, NE, RRID:SCR\_014579).

### 370 **Mouse sperm collection**

371 The caudal epididymides were dissected from the *Cfap53* wildtype and knockout mice.  
372 Spermatozoa were squeezed out from the caudal epididymis and released in 1 ml phosphate  
373 buffered saline (PBS) for 30 min at 37°C under 5% CO<sub>2</sub> for sperm counting and  
374 immunofluorescence experiments.

375 **Tissue collection and histological analysis**

376 The testes and caudal epididymides from at least five *Cfap53* wildtype and five knockout mice  
377 were dissected immediately after euthanasia. All samples were immediately fixed in 4%  
378 (mass/vol) paraformaldehyde (PFA; Solarbio, P1110) for up to 24 hours, dehydrated in 70%  
379 (vol/vol) ethanol, and embedded in paraffin. For histological analysis, the 5  $\mu$ m sections were  
380 mounted on glass slides and stained with H&E. For PAS staining, testes were fixed with Bouin's  
381 fixatives (Polysciences). Slides were stained with PAS and H&E after deparaffinization, and  
382 the stages of the seminiferous epithelium cycle and spermatid development were determined.

383 **Immunofluorescence of the testicular germ cells**

384 The mouse testis was immediately dissected and fixed with 2% paraformaldehyde in 0.05%  
385 PBST (PBS with 0.05% Triton X-100) at room temperature for 5 min. The fixed sample was  
386 placed on a slide glass and squashed by placing a cover slip on top and pressing down. The  
387 sample was immediately flash frozen in liquid nitrogen, and the slides were stored at  $-80^{\circ}\text{C}$  for  
388 further immunofluorescence experiments (Wellard et al., 2018). After removing the coverslips,  
389 the slides were washed with PBS three times and then treated with 0.1% Triton X-100 for 10  
390 min, rinsed three times in PBS, and blocked with 5% bovine serum albumin (Amresco,  
391 AP0027). The primary antibody was added to the sections and incubated at  $4^{\circ}\text{C}$  overnight,  
392 followed by incubation with the secondary antibody. The nuclei were stained with DAPI. The  
393 immunofluorescence images were taken immediately using an LSM 780 microscope (Zeiss) or  
394 SP8 microscope (Leica).

395 **Immunofluorescence in testes**

396 The testes of *Cfap53* wildtype and knockout mice were fixed in 4% PFA at  $4^{\circ}\text{C}$  overnight,

397 dehydrated in 70% (vol/vol) ethanol, and embedded in paraffin. For histological analysis, the 5  
398  $\mu\text{m}$  sections were mounted on glass slides, then deparaffinized and rehydrated, followed by  
399 antigen retrieval in 10 mM sodium citrate buffer (pH 6.0) for 15 min and washing three times  
400 in PBS, pH 7.4. After blocking with 5% BSA containing 0.1% Triton X-100, the primary  
401 antibodies were added to the sections and incubated at 4°C overnight, followed by incubation  
402 with the secondary antibody. The nuclei were stained with DAPI, and images were acquired on  
403 an SP8 microscope (Leica).

#### 404 **Transmission electron microscopy**

405 The testes from at least three *Cfap53* wildtype and knockout mice were dissected and pre-fixed  
406 in 2.5% (vol/vol) glutaraldehyde in 0.1 M cacodylate buffer at 4°C overnight. After washing in  
407 0.1 M cacodylate buffer, samples were cut into small pieces of approximately 1 mm<sup>3</sup>, then  
408 immersed in 1% OsO<sub>4</sub> for 1 hour at 4°C. Samples were dehydrated through a graded acetone  
409 series and embedded in resin for staining. Ultrathin sections were cut on an ultramicrotome and  
410 double stained with uranyl acetate and lead citrate, and images were acquired and analyzed  
411 using a JEM-1400 transmission electron microscope.

#### 412 **Statistical analysis**

413 All of the experiments were repeated at least three times, and the results are presented as the  
414 mean  $\pm$  SD. The statistical significance of the differences between the mean values for the  
415 different genotypes was measured by the Student's t-test with a paired, 2-tailed distribution.  
416 The data were considered significant for  $P < 0.05$ .

#### 417 **Contributors**

418 W.L. and H.B.L. designed the study and wrote the article. B.B.W. performed most of the

419 experiments and analyzed the data. X.C.Y. performed the experiments and assisted in writing  
420 the manuscript. C.L., L.N.W., and X.H.L. performed some of the immunofluorescence  
421 experiments. All authors assisted in data collection, interpreted the data, provided critical input  
422 to the manuscript, and approved the final manuscript.

### 423 **Acknowledgements**

424 This work was funded by the National Natural Science Foundation of China (grant 81925015),  
425 the Strategic Priority Research Program of the Chinese Academy of Sciences (grant  
426 XDA16020701) and Qilu Young Scholars Program of Shandong University. We would like to  
427 thank the State Key Laboratory of Membrane Biology, Institute of Zoology, Chinese Academy  
428 of Science, for our electron microscopy work, and we are grateful to Pengyan Xia for his help  
429 in preparing the electron microscopy sample.

### 430 **Conflicts of interest**

431 The authors declare no conflicts of interest with the contents of this article.

### 432 **References**

433 Ben Khelifa, M., Coutton, C., Zouari, R., Karaouzène, T., Rendu, J., Bidart, M., Yassine, S.,  
434 Pierre, V., Delaroche, J., Hennebicq, S., Grunwald, D., Escalier, D., Pernet-Gallay, K., Jouk, P.  
435 S., Thierry-Mieg, N., Touré, A., Arnoult, C., & Ray, P. F. (2014). Mutations in DNAH1, which  
436 encodes an inner arm heavy chain dynein, lead to male infertility from multiple morphological  
437 abnormalities of the sperm flagella. *Am J Hum Genet* 94(1), 95-104.  
438 <https://doi.org/10.1016/j.ajhg.2013.11.017>  
439 Beurois, J., Martinez, G., Cazin, C., Kherraf, Z.-E., Amiri-Yekta, A., Thierry-Mieg, N., Bidart,  
440 M., Petre, G., Satre, V., & Brouillet, S. J. H. R. (2019). CFAP70 mutations lead to male

- 441 infertility due to severe astheno-teratozoospermia. A case report *34*(10), 2071-2079.  
442 <https://doi.org/10.1093/humrep/dez166>
- 443 Boivin, J., Bunting, L., Collins, J. A., & Nygren, K. G. (2007). International estimates of  
444 infertility prevalence and treatment-seeking: potential need and demand for infertility medical  
445 care. *Hum Reprod* *22*(6), 1506-1512. <https://doi.org/10.1093/humrep/dem046>
- 446 Burgess, S. A., Walker, M. L., Sakakibara, H., Knight, P. J., & Oiwa, K. J. N. (2003). Dynein  
447 structure and power stroke. *Nature* *421*(6924), 715-718. <https://doi.org/10.1038/nature01377>
- 448 Chemes, H. E., & Rawe, V. Y. (2010). The making of abnormal spermatozoa: cellular and  
449 molecular mechanisms underlying pathological spermiogenesis. *Cell Tissue Res* *341*(3), 349-  
450 357. <https://doi.org/10.1007/s00441-010-1007-3>
- 451 Chen, H., Zhu, Y., Zhu, Z., Zhi, E., Lu, K., Wang, X., Liu, F., Li, Z., & Xia, W. (2018).  
452 Detection of heterozygous mutation in hook microtubule-tethering protein 1 in three patients  
453 with decapitated and decaudated spermatozoa syndrome. *J Med Genet* *55*(3), 150-157.  
454 <https://doi.org/10.1136/jmedgenet-2016-104404>
- 455 Chien, A., Shih, S. M., Bower, R., Tritschler, D., Porter, M. E., & Yildiz, A. (2017). Dynamics  
456 of the IFT machinery at the ciliary tip. *Elife*, *6*. <https://doi.org/10.7554/eLife.28606>
- 457 Coutton, C., Escoffier, J., Martinez, G., Arnoult, C., & Ray, P. F. (2015). Teratozoospermia:  
458 spotlight on the main genetic actors in the human. *Hum Reprod Update* *21*(4), 455-485.  
459 <https://doi.org/10.1093/humupd/dmv020>
- 460 Dong FN, A.-Y. A., Martinez G, Saut A, Tek J, Stouvenel L, Lorès P, Karaouzène T, Thierry-  
461 Mieg N, Satre V, Brouillet S, Daneshpour A, Hosseini SH, Bonhivers M, Gourabi H, Dulioust  
462 E, Arnoult C, Touré A, Ray PF, Zhao H, Coutton C. (2018). Absence of CFAP69 causes male

463 infertility due to multiple morphological abnormalities of the flagella in human and mouse. *The*  
464 *American Journal of Human Genetics* 102(4), 636-648.  
465 <https://doi.org/10.1016/j.ajhg.2018.03.007>

466 Escalier, D., & Touré, A. (2012). Morphological defects of sperm flagellum implicated in  
467 human male infertility. *Med Sci (Paris)* 28(5), 503-511.  
468 <https://doi.org/10.1051/medsci/2012285015>

469 He, X., Liu, C., Yang, X., Lv, M., Ni, X., Li, Q., Cheng, H., Liu, W., Tian, S., Wu, H., Gao, Y.,  
470 Yang, C., Tan, Q., Cong, J., Tang, D., Zhang, J., Song, B., Zhong, Y., Li, H., Zhi, W., Mao, X.,  
471 Fu, F., Ge, L., Shen, Q., Zhang, M., Saiyin, H., Jin, L., Xu, Y., Zhou, P., Wei, Z., Zhang, F., &  
472 Cao, Y. (2020). Bi-allelic Loss-of-function Variants in CFAP58 Cause Flagellar Axoneme and  
473 Mitochondrial Sheath Defects and Asthenoteratozoospermia in Humans and Mice. *Am J Hum*  
474 *Genet* 107(3), 514-526. <https://doi.org/10.1016/j.ajhg.2020.07.010>

475 Horowitz, E., Zhang, Z., Jones, B. H., Moss, S. B., Ho, C., Wood, J. R., Wang, X., Sammel, M.  
476 D., & Strauss, J. F., 3rd. (2005). Patterns of expression of sperm flagellar genes: early  
477 expression of genes encoding axonemal proteins during the spermatogenic cycle and shared  
478 features of promoters of genes encoding central apparatus proteins. *Mol Hum Reprod* 11(4),  
479 307-317. <https://doi.org/10.1093/molehr/gah163>

480 Huang, T., Yin, Y., Liu, C., Li, M., Yu, X., Wang, X., Zhang, H., Muhammad, T., Gao, F., Li,  
481 W., Zijiang, C., Hongbin, L., & Jinlong, M. (2020). Absence of murine CFAP61 causes male  
482 infertility due to multiple morphological abnormalities of the flagella. *Science Bulletin*  
483 <https://doi.org/10.1016>

484 Ide, T., Twan, W. K., Lu, H., Ikawa, Y., Lim, L. X., Henninger, N., Nishimura, H., Takaoka,

485 K., Narasimhan, V., Yan, X., Shiratori, H., Roy, S., & Hamada, H. (2020). CFAP53 regulates  
486 mammalian cilia-type motility patterns through differential localization and recruitment of  
487 axonemal dynein components. *PLoS Genet* 16(12), e1009232.  
488 <https://doi.org/10.1371/journal.pgen.1009232>

489 Kierszenbaum, A. L. (2001). Spermatid manchette: plugging proteins to zero into the sperm  
490 tail. *Mol Reprod Dev* 59(4), 347-349. <https://doi.org/10.1002/mrd.1040>

491 Kierszenbaum, A. L. (2002). Intramanchette transport (IMT): managing the making of the  
492 spermatid head, centrosome, and tail. *Mol Reprod Dev* 63(1), 1-4.  
493 <https://doi.org/10.1002/mrd.10179>

494 Kierszenbaum, A. L., Rivkin, E., & Tres, L. L. (2011). Cytoskeletal track selection during cargo  
495 transport in spermatids is relevant to male fertility. *Spermatogenesis* 1(3), 221-230.  
496 <https://doi.org/10.4161/spmg.1.3.18018>

497 Kierszenbaum, A. L., Rivkin, E., Tres, L. L., Yoder, B. K., Haycraft, C. J., Bornens, M., &  
498 Rios, R. M. (2011). GMAP210 and IFT88 are present in the spermatid golgi apparatus and  
499 participate in the development of the acrosome-acroplaxome complex, head-tail coupling  
500 apparatus and tail. *Dev Dyn* 240(3), 723-736. <https://doi.org/10.1002/dvdy.22563>

501 Kierszenbaum, A. L., & Tres, L. L. (2004). The acrosome-acroplaxome-manchette complex  
502 and the shaping of the spermatid head. *Arch Histol Cytol* 67(4), 271-284.  
503 <https://doi.org/10.1679/aohc.67.271>

504 Lehti, M. S., Kotaja, N., & Sironen, A. (2013). KIF3A is essential for sperm tail formation and  
505 manchette function. *Mol Cell Endocrinol* 377(1-2), 44-55.  
506 <https://doi.org/10.1016/j.mce.2013.06.030>

- 507 Lehti, M. S., & Sironen, A. (2016). Formation and function of the manchette and flagellum  
508 during spermatogenesis. *Reproduction* 151(4), R43-54. <https://doi.org/10.1530/REP-15-0310>
- 509 Lehti, M. S., & Sironen, A. (2017). Formation and function of sperm tail structures in  
510 association with sperm motility defects. *Biol. Reprod* 97(4), 522-536.  
511 <https://doi.org/10.1093/biolre/iox096>
- 512 Li, L., Sha, Y., Wang, X., Li, P., Wang, J., Kee, K., & Wang, B. (2017). Whole-exome  
513 sequencing identified a homozygous BRDT mutation in a patient with acephalic spermatozoa.  
514 *Oncotarget* 8(12), 19914-19922. <https://doi.org/10.18632/oncotarget.15251>
- 515 Li, W., He, X., Yang, S., Liu, C., Wu, H., Liu, W., Lv, M., Tang, D., Tan, J., & Tang, S. (2019).  
516 Biallelic mutations of CFAP251 cause sperm flagellar defects and human male infertility.  
517 *Journal of human genetics* 64(1), 49-54. <https://doi.org/10.1038/s10038-018-0520-1>
- 518 Li, W., Wu, H., Li, F., Tian, S., Kherraf, Z.-E., Zhang, J., Ni, X., Lv, M., Liu, C., & Tan, Q.  
519 (2020). Biallelic mutations in CFAP65 cause male infertility with multiple morphological  
520 abnormalities of the sperm flagella in humans and mice. *J Med Genet* 57(2), 89-95.  
521 <https://doi.org/10.1136/jmedgenet-2019-106344>
- 522 Li, Y., Sha, Y., Wang, X., Ding, L., Liu, W., Ji, Z., Mei, L., Huang, X., Lin, S., Kong, S., Lu,  
523 J., Qin, W., Zhang, X., Zhuang, J., Tang, Y., & Lu, Z. (2019). DNAH2 is a novel candidate  
524 gene associated with multiple morphological abnormalities of the sperm flagella. *Clin Genet*  
525 95(5), 590-600. <https://doi.org/10.1111/cge.13525>
- 526 Liu, C., He, X., Liu, W., Yang, S., Wang, L., Li, W., Wu, H., Tang, S., Ni, X., Wang, J., Gao,  
527 Y., Tian, S., Zhang, L., Cong, J., Zhang, Z., Tan, Q., Zhang, J., Li, H., Zhong, Y., Lv, M., Li,  
528 J., Jin, L., Cao, Y., & Zhang, F. (2019). Bi-allelic Mutations in TTC29 Cause Male Subfertility



529 with Asthenoteratospermia in Humans and Mice. *Am J Hum Genet* 105(6), 1168-1181.  
530 <https://doi.org/10.1016/j.ajhg.2019.10.010>

531 Liu, C., Lv, M., He, X., Zhu, Y., Amiri-Yekta, A., Li, W., Wu, H., Kherraf, Z.-E., Liu, W., &  
532 Zhang, J. (2020). Homozygous mutations in SPEF2 induce multiple morphological  
533 abnormalities of the sperm flagella and male infertility. *Journal of Medical Genetics* 57(1), 31-  
534 37. <https://doi.org/10.1136/jmedgenet-2019-106011>

535 Liu, C., Miyata, H., Gao, Y., Sha, Y., Tang, S., Xu, Z., Whitfield, M., Patrat, C., Wu, H.,  
536 Dulioust, E., Tian, S., Shimada, K., Cong, J., Noda, T., Li, H., Morohoshi, A., Cazin, C.,  
537 Kherraf, Z. E., Arnoult, C., Jin, L., He, X., Ray, P. F., Cao, Y., Touré, A., Zhang, F., & Ikawa,  
538 M. (2020). Bi-allelic DNAH8 Variants Lead to Multiple Morphological Abnormalities of the  
539 Sperm Flagella and Primary Male Infertility. *Am J Hum Genet* 107(2), 330-341.  
540 <https://doi.org/10.1016/j.ajhg.2020.06.004>

541 Liu, W., He, X., Yang, S., Zouari, R., Wang, J., Wu, H., Kherraf, Z. E., Liu, C., Coutton, C.,  
542 Zhao, R., Tang, D., Tang, S., Lv, M., Fang, Y., Li, W., Li, H., Zhao, J., Wang, X., Zhao, S.,  
543 Zhang, J., Arnoult, C., Jin, L., Zhang, Z., Ray, P. F., Cao, Y., & Zhang, F. (2019). Bi-allelic  
544 Mutations in TTC21A Induce Asthenoteratospermia in Humans and Mice. *Am J Hum Genet*  
545 104(4), 738-748. <https://doi.org/10.1016/j.ajhg.2019.02.020>

546 Lv, M., Liu, W., Chi, W., Ni, X., Wang, J., Cheng, H., Li, W.-Y., Yang, S., Wu, H., & Zhang,  
547 J. (2020). Homozygous mutations in DZIP1 can induce asthenoteratospermia with severe  
548 MMAF. *J Med Genet* <https://doi.org/10.1136/jmedgenet-2019-106479>

549 Marszalek JR, R.-L. P., Roberts E, Chien KR, Goldstein LS. (1999). Situs inversus and  
550 embryonic ciliary morphogenesis defects in mouse mutants lacking the KIF3A subunit of

- 551 kinesin-II. *Proceedings of the National Academy of Sciences* 96(9), 5043-5048.
- 552 <https://doi.org/10.1073/pnas.96.9.5043>
- 553 Martinez, G., Kherraf, Z. E., Zouari, R., Fourati Ben Mustapha, S., Saut, A., Pernet-Gallay, K.,
- 554 Bertrand, A., Bidart, M., Hograindleur, J. P., Amiri-Yekta, A., Kharouf, M., Karaouzène, T.,
- 555 Thierry-Mieg, N., Dacheux-Deschamps, D., Satre, V., Bonhivers, M., Touré, A., Arnoult, C.,
- 556 Ray, P. F., & Coutton, C. (2018). Whole-exome sequencing identifies mutations in FSIP2 as a
- 557 recurrent cause of multiple morphological abnormalities of the sperm flagella. *Hum Reprod*
- 558 33(10), 1973-1984. <https://doi.org/10.1093/humrep/dey264>
- 559 Mortimer, D. (2018). The functional anatomy of the human spermatozoon: relating
- 560 ultrastructure and function. *Mol. Hum. Reprod* 24(12), 567-592.
- 561 <https://doi.org/10.1093/molehr/gay040>
- 562 Narasimhan, V., Hjeij, R., Vij, S., Loges, N. T., Wallmeier, J., Koerner-Rettberg, C., Werner,
- 563 C., Thamilselvam, S. K., Boey, A., Choksi, S. P., Pennekamp, P., Roy, S., & Omran, H. (2015).
- 564 Mutations in CCDC11, which encodes a coiled-coil containing ciliary protein, causes situs
- 565 inversus due to dysmotility of monocilia in the left-right organizer. *Hum Mutat* 36(3), 307-318.
- 566 <https://doi.org/10.1002/humu.22738>
- 567 Noël, E. S., Momenah, T. S., Al-Dagriri, K., Al-Suwaid, A., Al-Shahrani, S., Jiang, H.,
- 568 Willekers, S., Oostveen, Y. Y., Chocron, S., Postma, A. V., Bhuiyan, Z. A., & Bakkers, J.
- 569 (2016). A Zebrafish Loss-of-Function Model for Human CFAP53 Mutations Reveals Its
- 570 Specific Role in Laterality Organ Function. *Human Mutation* 37(2), 194-200.
- 571 <https://doi.org/10.1002/humu.22928>
- 572 Pasek, R. C., Malarkey, E., Berbari, N. F., Sharma, N., Kesterson, R. A., Tres, L. L.,

573 Kierszenbaum, A. L., & Yoder, B. K. (2016). Coiled-coil domain containing 42 (Ccdc42) is  
574 necessary for proper sperm development and male fertility in the mouse. *Dev. Biol* 412(2),  
575 208-218. <https://doi.org/10.1016/j.ydbio.2016.01.042>

576 Perles, Z., Cinnamon, Y., Ta-Shma, A., Shaag, A., Einbinder, T., Rein, A. J. J. T., & Elpeleg,  
577 O. (2012). A human laterality disorder associated with recessive CCDC11 mutation. *J Med*  
578 *Genet*, 49(6) 386-390. <https://doi.org/10.1136/jmedgenet-2011-100457>

579 Ray, P. F., Toure, A., Metzler-Guillemain, C., Mitchell, M. J., Arnoult, C., & Coutton, C.  
580 (2017). Genetic abnormalities leading to qualitative defects of sperm morphology or function.  
581 *Clin Genet* 91(2), 217-232. <https://doi.org/10.1111/cge.12905>

582 San Agustin, J. T., Pazour, G. J., & Witman, G. B. (2015). Intraflagellar transport is essential  
583 for mammalian spermiogenesis but is absent in mature sperm. *Mol Biol Cell* 26(24), 4358-  
584 4372. <https://doi.org/10.1091/mbc.E15-08-0578>

585 Sha, Y., Liu, W., Wei, X., Zhu, X., Luo, X., Liang, L., & Guo, T. (2019). Biallelic mutations  
586 in Sperm flagellum 2 cause human multiple morphological abnormalities of the sperm flagella  
587 (MMAF) phenotype. *Clin Genet* 96(5), 385-393. <https://doi.org/10.1111/cge.13602>

588 Sha, Y., Wang, X., Yuan, J., Zhu, X., Su, Z., Zhang, X., Xu, X., & Wei, X. (2020). Loss-of-  
589 function mutations in centrosomal protein 112 is associated with human acephalic spermatozoa  
590 phenotype. *Clin Genet* 97(2), 321-328. <https://doi.org/10.1111/cge.13662>

591 Sha, Y., Wei, X., Ding, L., Mei, L., Huang, X., Lin, S., Su, Z., Kong, L., Zhang, Y., & Ji, Z.  
592 (2020). DNAH17 is associated with asthenozoospermia and multiple morphological  
593 abnormalities of sperm flagella. *Ann Hum Genet* 84(3), 271-279.  
594 <https://doi.org/10.1111/ahg.12369>

- 595 Sha, Y. W., Sha, Y. K., Ji, Z. Y., Mei, L. B., Ding, L., Zhang, Q., Qiu, P. P., Lin, S. B., Wang,  
596 X., Li, P., Xu, X., & Li, L. (2018). TSGA10 is a novel candidate gene associated with acephalic  
597 spermatozoa. *Clin. Genet* 93(4), 776-783. <https://doi.org/10.1111/cge.13140>
- 598 Shang, Y., Yan, J., Tang, W., Liu, C., Xiao, S., Guo, Y., Yuan, L., Chen, L., Jiang, H., Guo, X.,  
599 Qiao, J., & Li, W. (2018). Mechanistic insights into acephalic spermatozoa syndrome-  
600 associated mutations in the human SUN5 gene. *J Biol Chem* 293(7), 2395-2407.  
601 <https://doi.org/10.1074/jbc.RA117.000861>
- 602 Silva, E., Betleja, E., John, E., Spear, P., Moresco, J. J., Zhang, S., Yates, J. R., Mitchell, B. J.,  
603 & Mahjoub, M. R. (2016). Ccdc11 is a novel centriolar satellite protein essential for ciliogenesis  
604 and establishment of left-right asymmetry. *Mol. Biol. Cell* 27(1), 48-63.  
605 <https://doi.org/10.1091/mbc.E15-07-0474>
- 606 Sironen, A., Shoemark, A., Patel, M., Loebinger, M. R., & Mitchison, H. M. (2020). Sperm  
607 defects in primary ciliary dyskinesia and related causes of male infertility. *Cell Mol Life Sci*  
608 77(11), 2029-2048. <https://doi.org/10.1007/s00018-019-03389-7>
- 609 Tang, S., Wang, X., Li, W., Yang, X., Li, Z., Liu, W., Li, C., Zhu, Z., Wang, L., & Wang, J.  
610 (2017). Biallelic mutations in CFAP43 and CFAP44 cause male infertility with multiple  
611 morphological abnormalities of the sperm flagella. *The American Journal of Human Genetics*  
612 100(6), 854-864. <https://doi.org/10.1016/j.ajhg.2017.04.012>
- 613 Tapia Contreras, C., & Hoyer-Fender, S. (2019). CCDC42 Localizes to Manchette, HTCA and  
614 Tail and Interacts With ODF1 and ODF2 in the Formation of the Male Germ Cell Cytoskeleton.  
615 *Front Cell Dev Biol* 7, 151. <https://doi.org/10.3389/fcell.2019.00151>
- 616 Touré, A., Martinez, G., Kherraf, Z. E., Cazin, C., Beurois, J., Arnoult, C., Ray, P. F., & Coutton,

- 617 C. (2020). The genetic architecture of morphological abnormalities of the sperm tail. *Hum*  
618 *Genet* <https://doi.org/10.1007/s00439-020-02113-x>
- 619 Tu, C., Nie, H., Meng, L., Yuan, S., He, W., Luo, A., Li, H., Li, W., Du, J., Lu, G., Lin, G., &  
620 Tan, YQ. (2019). Identification of DNAH6 mutations in infertile men with multiple  
621 morphological abnormalities of the sperm flagella. *Sci Rep* 9(1), 15864.  
622 <https://doi.org/10.1038/s41598-019-52436-7>
- 623 Tu, C., Wang, W., Hu, T., Lu, G., Lin, G., & Tan, YQ. (2020). Genetic underpinnings of  
624 asthenozoospermia. *Best Pract Res Clin Endocrinol Metab* 101472. [https://doi.org/](https://doi.org/10.1016/j.beem.2020.101472)  
625 [10.1016/j.beem.2020.101472](https://doi.org/10.1016/j.beem.2020.101472)
- 626 Turner, K. A., Rambhatla, A., Schon, S., Agarwal, A., Krawetz, S. A., Dupree, J. M., & Avidor-  
627 Reiss, T. (2020). Male Infertility is a Women's Health Issue-Research and Clinical Evaluation  
628 of Male Infertility Is Needed. *Cells*, 9(4). <https://doi.org/10.3390/cells9040990>
- 629 Turner, R. M., Musse, M. P., Mandal, A., Klotz, K., Jayes, F. C., Herr, J. C., Gerton, G. L.,  
630 Moss, S. B., & Chemes, H. E. (2001). Molecular genetic analysis of two human sperm fibrous  
631 sheath proteins, AKAP4 and AKAP3, in men with dysplasia of the fibrous sheath. *J Androl*  
632 22(2), 302-315.
- 633 Tüttelmann, F., Ruckert, C., & Röpke, A. (2018). Disorders of spermatogenesis: Perspectives  
634 for novel genetic diagnostics after 20 years of unchanged routine. *Med Genet* 30(1), 12-20.  
635 <https://doi.org/10.1007/s11825-018-0181-7>
- 636 Wellard, S. R., Hopkins, J., & Jordan, P. W. (2018). A seminiferous tubule squash technique  
637 for the cytological analysis of spermatogenesis using the mouse model. *JoVE*(132) e56453.  
638 <https://doi.org/10.3791/56453>

639 Wu, B., Gao, H., Liu, C., & Li, W. (2020). The coupling apparatus of the sperm head and tail.  
640 *Biol Reprod* 102(5), 988-998. <https://doi.org/10.1093/biolre/ioaa016>

641 Zhang, Z., Li, W., Zhang, Y., Zhang, L., Teves, M. E., Liu, H., Strauss, J. F., 3rd, Pazour, G.  
642 J., Foster, J. A., Hess, R. A., & Zhang, Z. (2016). Intraflagellar transport protein IFT20 is  
643 essential for male fertility and spermiogenesis in mice. *Mol Biol Cell* 27(23), 3705-3716.  
644 <https://doi.org/10.1091/mbc.E16-05-0318>

645 Zhu, F., Liu, C., Wang, F., Yang, X., Zhang, J., Wu, H., Zhang, Z., He, X., Zhang, Z., Zhou,  
646 P., Wei, Z., Shang, Y., Wang, L., Zhang, R., Ouyang, Y. C., Sun, Q. Y., Cao, Y., & Li, W.  
647 (2018). Mutations in PMFBP1 Cause Acephalic Spermatozoa Syndrome. *Am J Hum Genet*  
648 103(2), 188-199. <https://doi.org/10.1016/j.ajhg.2018.06.010>

649 Zhu, F., Wang, F., Yang, X., Zhang, J., Wu, H., Zhang, Z., Zhang, Z., He, X., Zhou, P., Wei,  
650 Z., Gecz, J., & Cao, Y. (2016). Biallelic SUN5 Mutations Cause Autosomal-Recessive  
651 Acephalic Spermatozoa Syndrome. *Am J Hum Genet* 99(4), 942-949.  
652 <https://doi.org/10.1016/j.ajhg.2016.11.002>

653 Zhu, X., Wang, J., Li, S., Lechtreck, K., & Pan, J. (2020). IFT54 directly interacts with kinesin-  
654 II and IFT dynein to regulate anterograde intraflagellar transport. *Embo j*, e105781.  
655 <https://doi.org/10.15252/emboj.2020105781>

656 Zinaman, M. J., Brown, C. C., Selevan, S. G., & Clegg, E. D. (2000). Semen quality and human  
657 fertility: a prospective study with healthy couples. *J Androl* 21(1), 145-153.

658

659

660

661 **Figures and Figure legends**

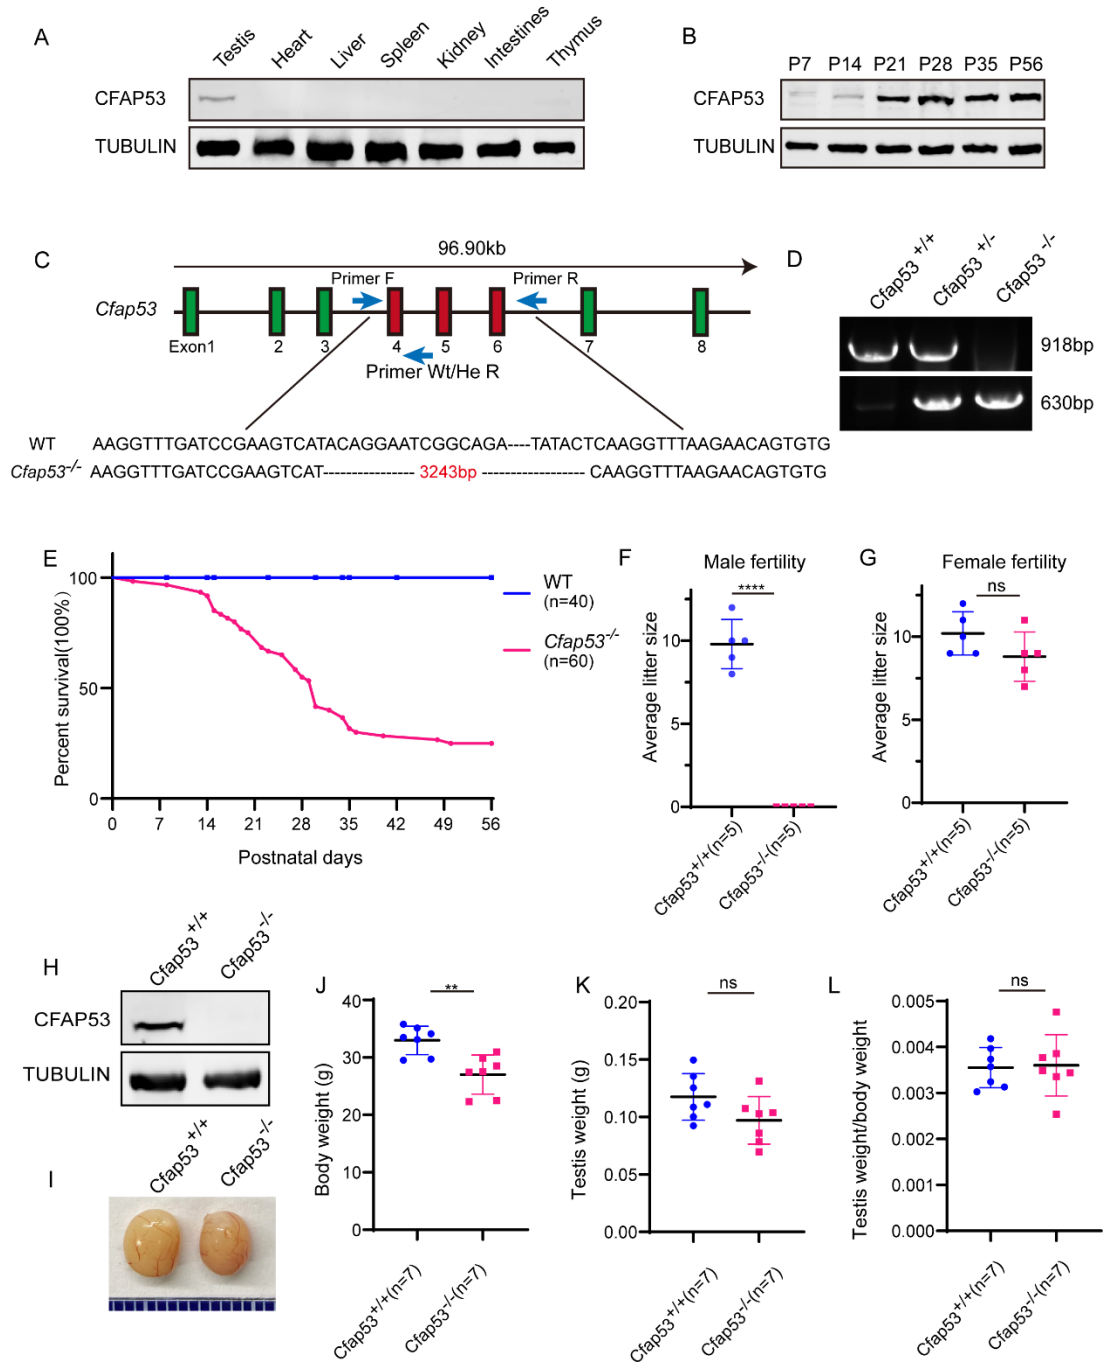

662

663 **Fig. 1. The generation of *Cfap53* knockout mice. (A) CFAP53 was predominately expressed**

664 **in testis. Immunoblotting of CFAP53 was performed in testis, heart, liver, spleen, kidney,**

665 **intestines, and thymus with Tubulin serving as the control. (B) CFAP53 was expressed starting**

666 **in P7 testes. Tubulin served as the control. (C) The generation of *Cfap53*<sup>-/-</sup> mice lacking exons**

667 **4 to 6. (D) Genotyping of *Cfap53* *Cfap53*<sup>-/-</sup> mice. (E) Survival rate of postnatal *Cfap53*<sup>-/-</sup> mice**

668 (n = 60). (F) The average litter size of *Cfap53<sup>+/+</sup>* and *Cfap53<sup>-/-</sup>* male mice at 3 months (n = 5  
669 independent experiments). *Cfap53<sup>-/-</sup>* male mice were completely sterile. Data are presented as  
670 the mean  $\pm$  SD. \*\*\*\* $P < 0.0001$ . (G) The average litter size of *Cfap53<sup>+/+</sup>* and *Cfap53<sup>-/-</sup>* female  
671 mice at 3 months (n = 5 independent experiments). *Cfap53<sup>-/-</sup>* female mice were fertile. Data are  
672 presented as the mean  $\pm$  SD. (H) Immunoblotting of CFAP53 in *Cfap53<sup>+/+</sup>* and *Cfap53<sup>-/-</sup>* testes.  
673 Tubulin served as the control. (I) The testis sizes of *Cfap53<sup>+/+</sup>* and *Cfap53<sup>-/-</sup>* mice were similar  
674 to each other. Data are presented as the mean  $\pm$  SD. (J) The body weights of *Cfap53<sup>-/-</sup>* male  
675 mice were lower compared to *Cfap53<sup>+/+</sup>* male mice (n = 7 independent experiments). Data are  
676 presented as the mean  $\pm$  SD. \*\* $P < 0.01$ . (K) The testis weights of *Cfap53<sup>+/+</sup>* and *Cfap53<sup>-/-</sup>*  
677 male mice (n = 7 independent experiments). Data are presented as the mean  $\pm$  SD. (L) The ratio  
678 of testis weight/body weight in *Cfap53<sup>+/+</sup>* and *Cfap53<sup>-/-</sup>* male mice (n = 7 independent  
679 experiments). Data are presented as the mean  $\pm$  SD.



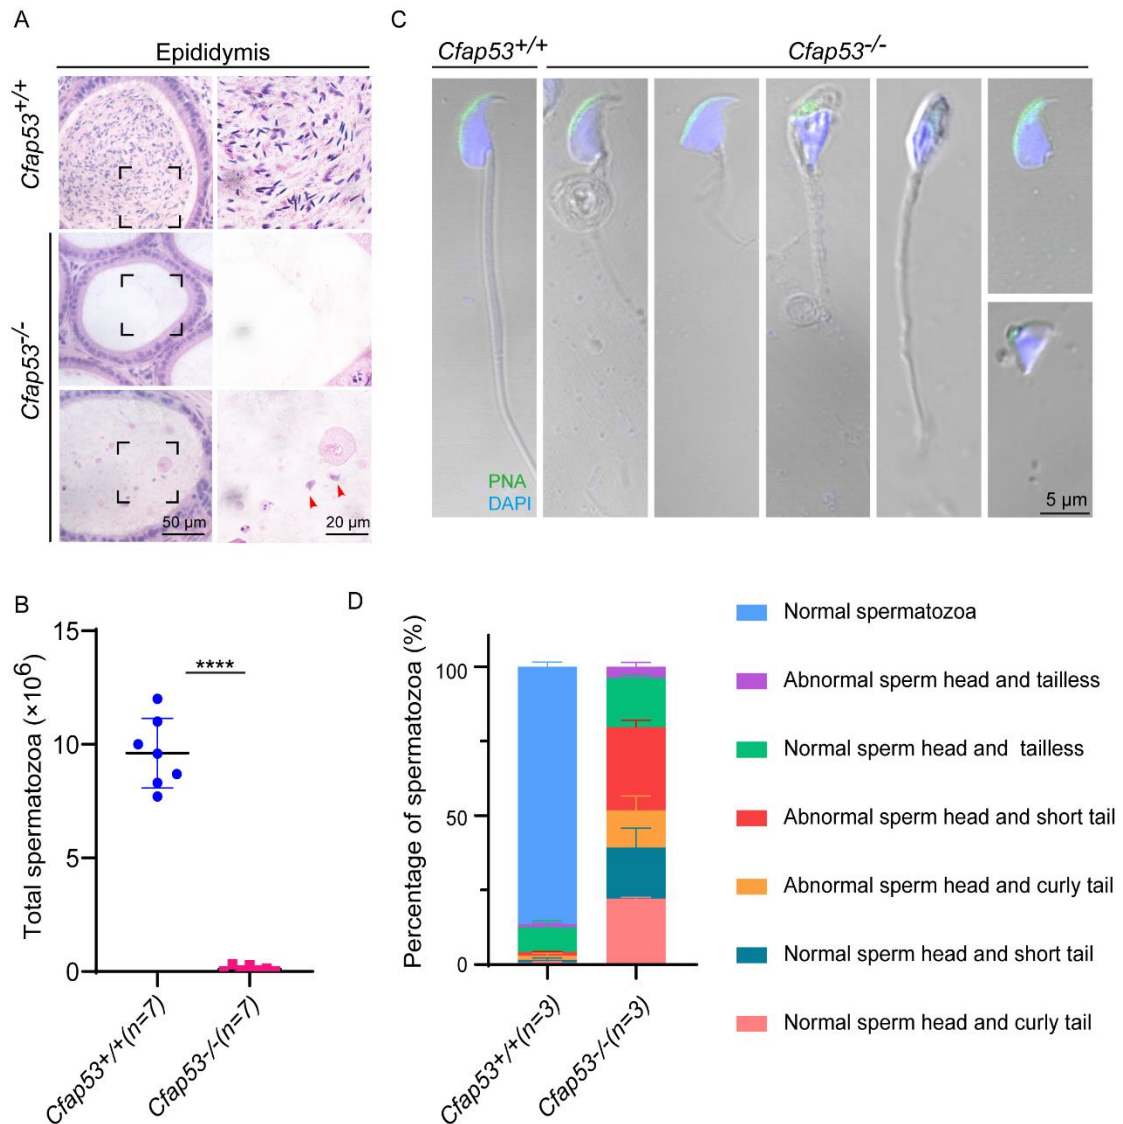

680

681 **Fig. 2. CFAP53 knockout results in MMAF.** (A) H&E staining of the caudal epididymis

682 from *Cfap53*<sup>+/+</sup> and *Cfap53*<sup>-/-</sup> male mice. (B) The sperm counts in the caudal epididymis were

683 significantly decreased in the *Cfap53*<sup>-/-</sup> male mice (n = 7 independent experiments). Data are

684 presented as the mean  $\pm$  SD. \*\*\*\**P* < 0.0001. (C) Immunofluorescence staining of PNA in

685 *Cfap53*<sup>+/+</sup> and *Cfap53*<sup>-/-</sup> spermatozoa, indicating abnormal spermatozoa such as abnormal head

686 and coiled, short, or absent flagella. (D) Quantification of different categories of abnormal

687 spermatozoa (n = 3 independent experiments). Data are presented as the mean  $\pm$  SD. The

688 statistical significance of the differences between the mean values for the different genotypes

689 was measured by Student's t-test with a paired 2-tailed distribution.

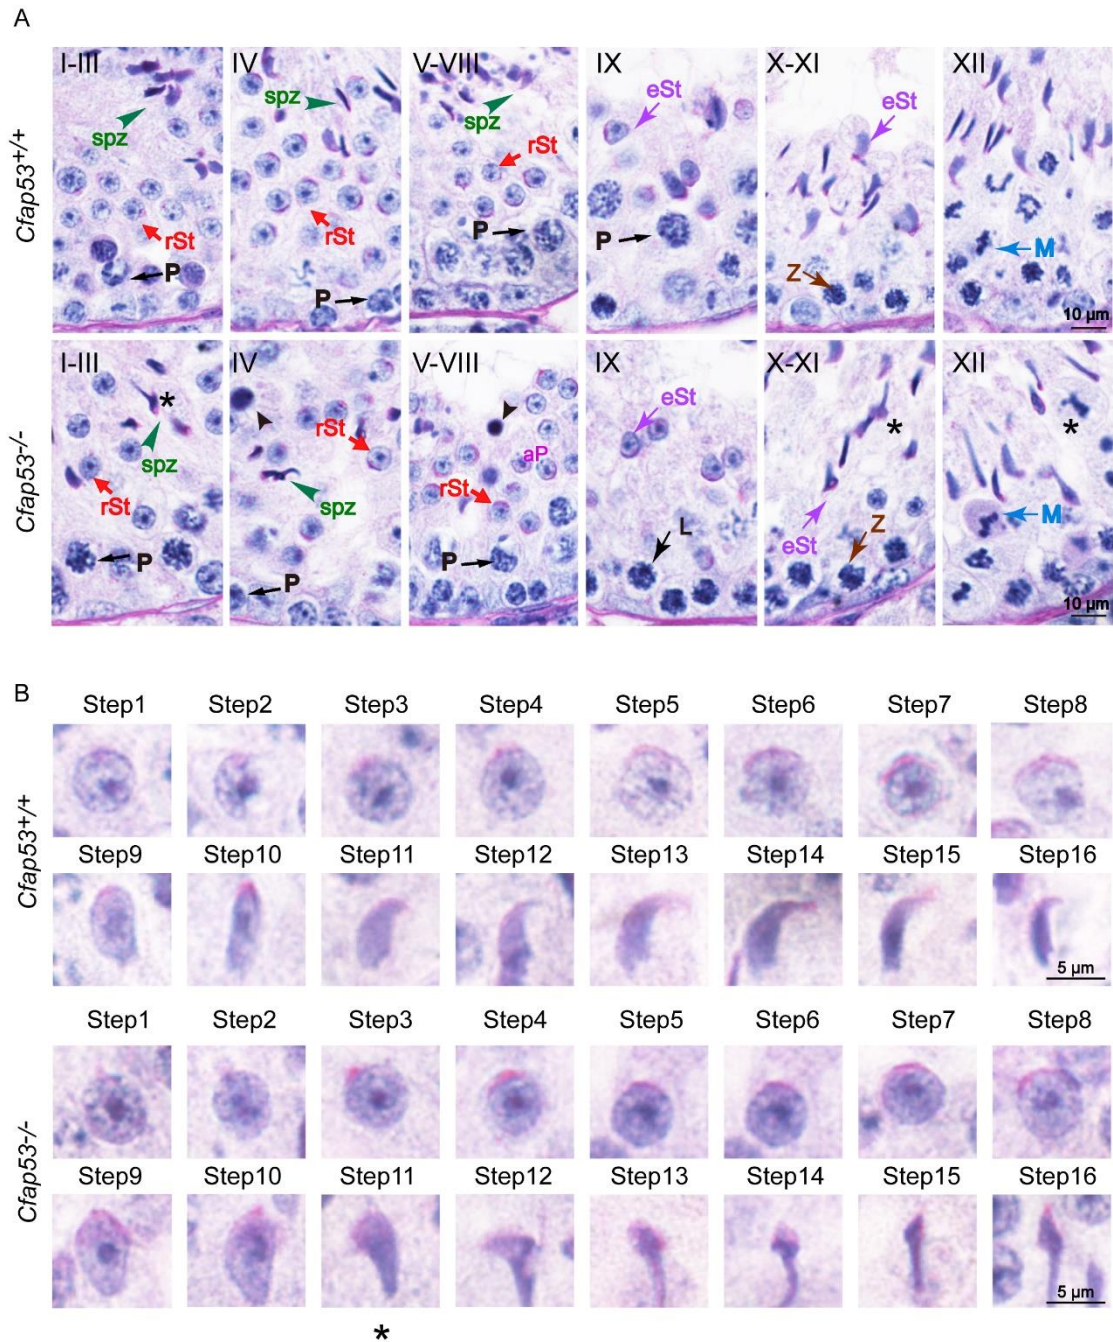

696 spermatid, eST: elongating spermatid, spz: spermatozoa. (B) The PAS staining of spermatids at  
697 different steps from *Cfap53*<sup>+/+</sup> and *Cfap53*<sup>-/-</sup> mice. From step 1 to step 10 spermatids, the head  
698 morphology was roughly normal in *Cfap53*<sup>-/-</sup> mice. Abnormal, club-shaped heads (asterisk)  
699 were first seen in step 11 spermatids in *Cfap53*<sup>-/-</sup> mice.



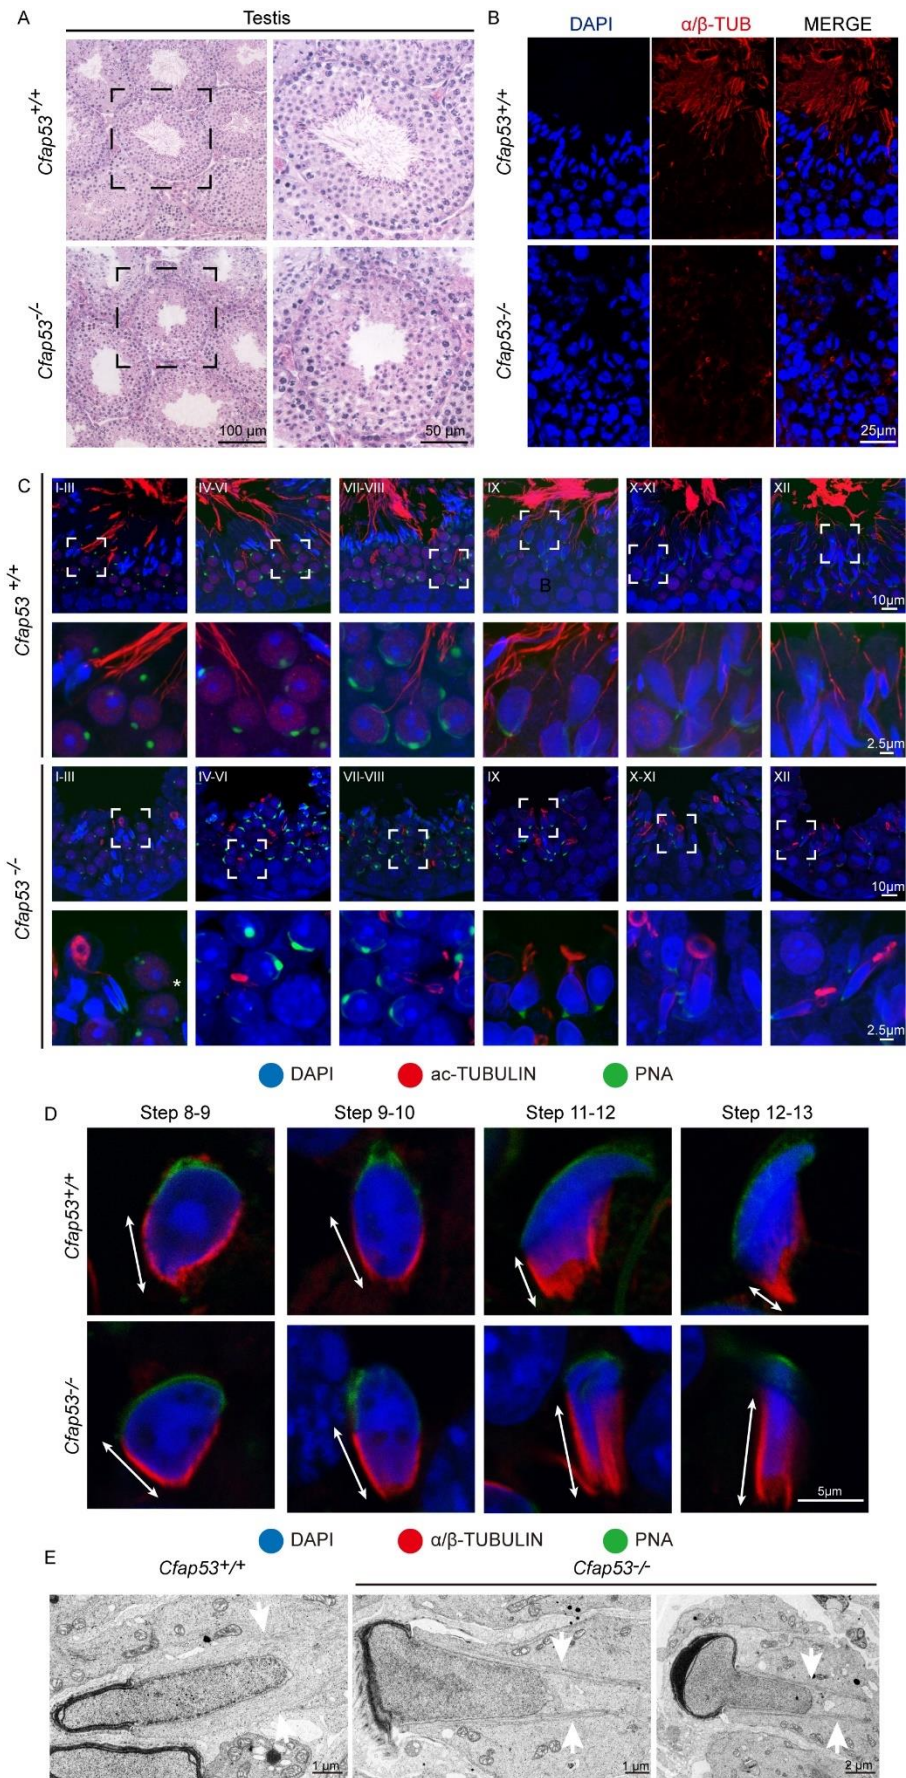

700

701 **Fig. 4. Sperm flagellum biogenesis defects and abnormal manchettes in *Cfap53*<sup>-/-</sup> mice.** (A)  
702 H&E staining of testes sections from *Cfap53*<sup>+/+</sup> and *Cfap53*<sup>-/-</sup> male mice. (B)  
703 Immunofluorescence of anti- $\alpha/\beta$ -tubulin (red) antibodies in testes sections from *Cfap53*<sup>-/-</sup> male  
704 mice show flagellar defects. (C) Comparison of flagellum biogenesis in testes sections from  
705 *Cfap53*<sup>+/+</sup> and *Cfap53*<sup>-/-</sup> mice at different stages. Sperm flagella were stained with acetylated  
706 Tubulin (red), the acrosome was stained with PNA lectin histochemistry (green), and the  
707 nucleus was stained with DAPI (blue). Flagellum formation was first observed at stages I-III of  
708 the seminiferous epithelial cycle in *Cfap53*<sup>+/+</sup> mice, while sperm tails were not detected  
709 (asterisks) at stages I-III in testes sections in *Cfap53*<sup>-/-</sup> mice. From stages IV-VI, sperm  
710 flagellum biogenesis defects were clearly seen in *Cfap53*<sup>-/-</sup> testis sections. (D) Comparison of  
711 manchette formation between *Cfap53*<sup>+/+</sup> and *Cfap53*<sup>-/-</sup> spermatids at different steps. The  
712 manchette was stained with  $\alpha/\beta$ -tubulin (red), the acrosome was stained with PNA lectin  
713 histochemistry (green), and the nucleus was stained with DAPI (blue). The distance from the  
714 perinuclear ring to the caudal side of the nucleus is indicated by white arrows. During steps 12  
715 and 13, the distance was reduced in *Cfap53*<sup>+/+</sup> spermatids, while the manchette of *Cfap53*<sup>-/-</sup>  
716 spermatids displayed abnormal elongation. (E) Transmission electron microscope images of  
717 *Cfap53*<sup>-/-</sup> step 11-13 spermatids showing the perinuclear ring constricting the sperm nucleus  
718 and causing abnormal sperm head formation. White arrows indicate the manchette microtubules.  
719

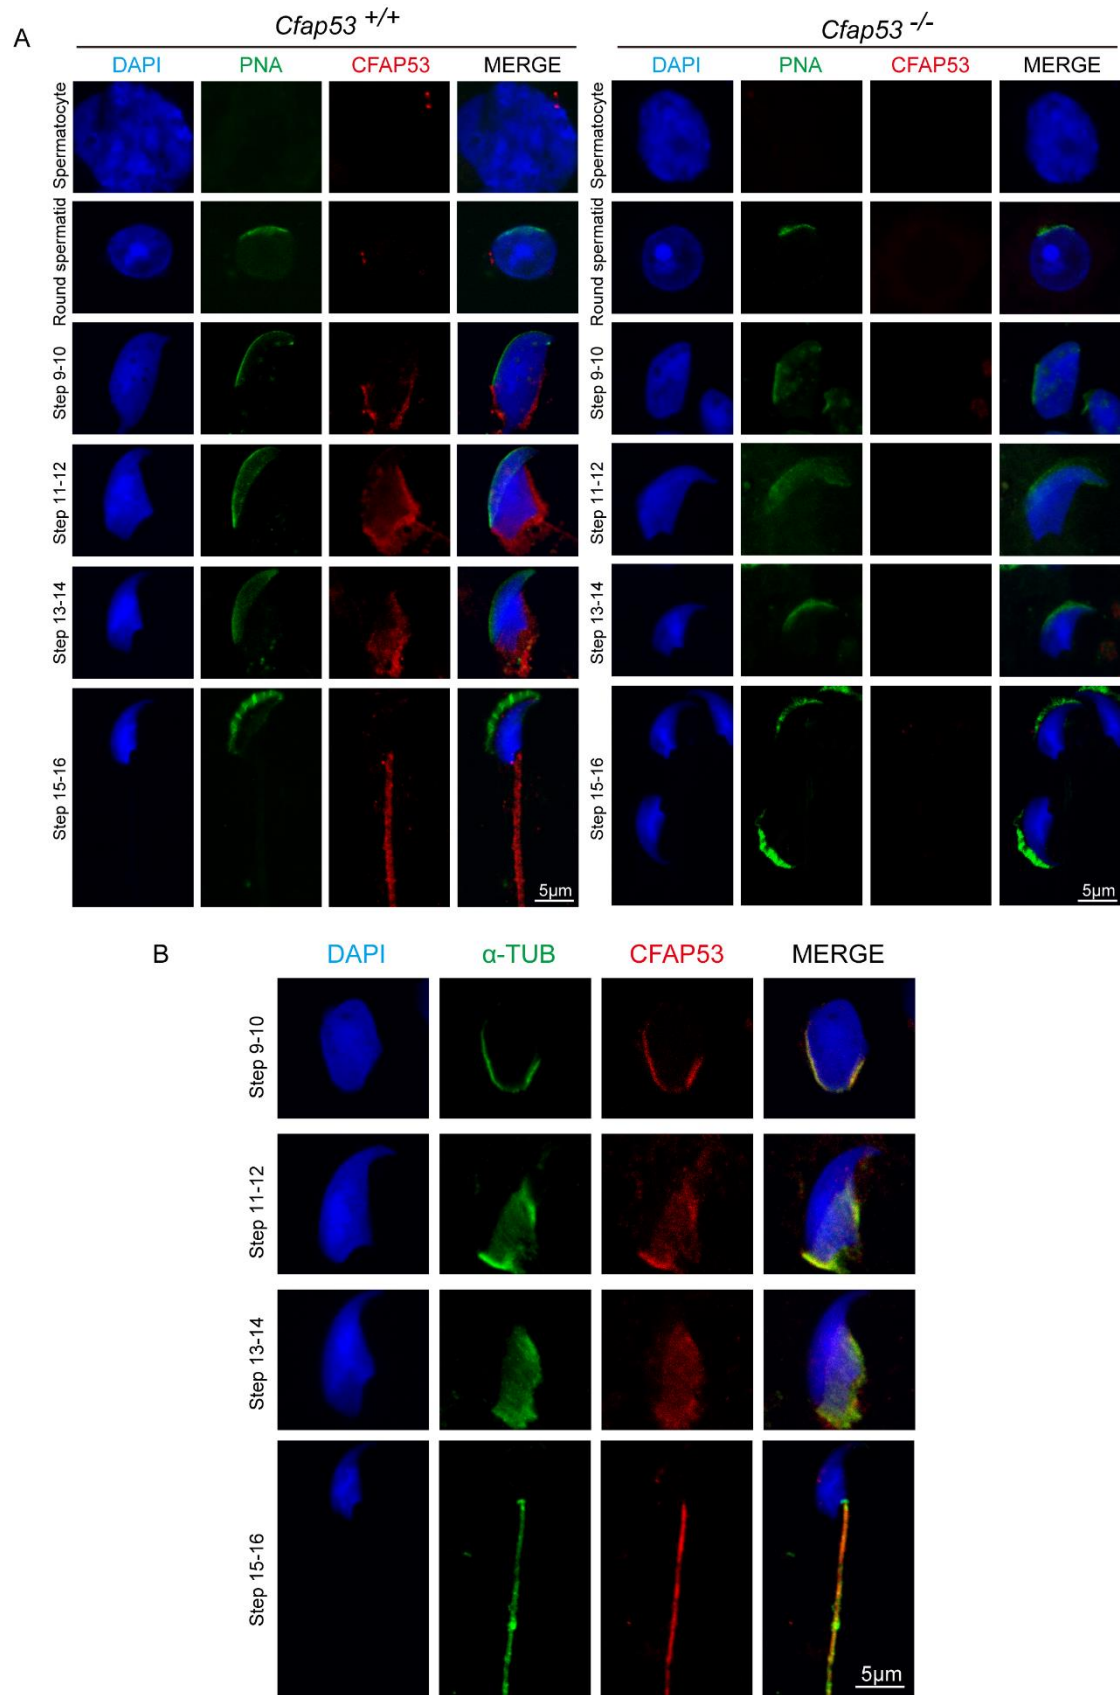

720

721 **Fig. 5. Localization of CFAP53 in developing germ cells.** (A) Testicular germ cells were

722 prepared from *Cfap53*<sup>+/+</sup> and *Cfap53*<sup>-/-</sup> adult mouse testis, and immunofluorescence staining

723 was performed with antibodies to CFAP53 (red). The acrosome was stained with PNA lectin  
724 histochemistry (green), and the nucleus was stained with DAPI (blue). (B) Testicular spermatids  
725 of WT adult mouse testes were stained with antibodies against  $\alpha$ -tubulin (green) and CFAP53  
726 (red). The nucleus was stained with DAPI (blue). In step 9–14 spermatids, CFAP53 was  
727 detected at the manchette. In 15–16 spermatids, CFAP53 was located at the sperm tail.



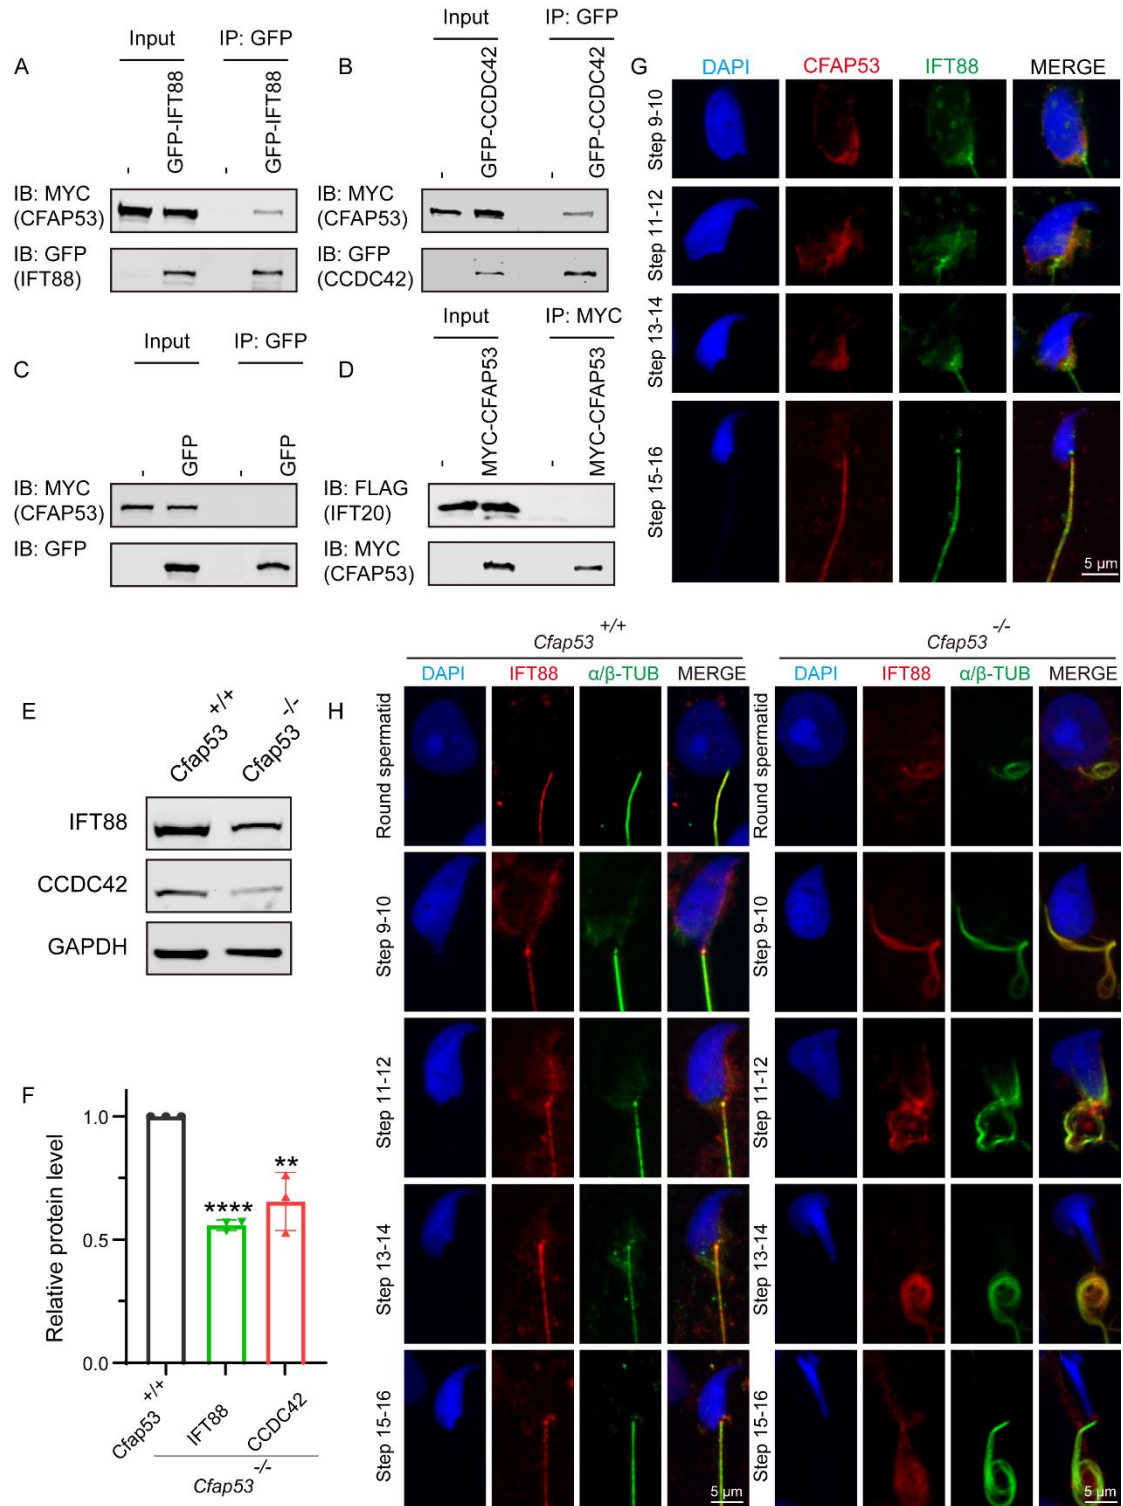

728

729 **Fig. 6. CFAP53 interacts with IFT88 and CCDC42.** (A) and (B) CFAP53 interacts with  
730 IFT88 and CCDC42. *pCS2-Myc-Cfap53* and *pEGFP-GFP-Ift88* or *pEGFP-GFP-Ccdc42* were  
731 co-transfected into HEK293T cells. At 48 h after transfection, the cells were collected for  
732 immunoprecipitation (IP) with anti-GFP antibody and analyzed with anti-MYC and anti-GFP



733 antibodies. (C) *pCS2-Myc-Cfap53* and Empty vector were co-transfected into HEK293T cells.  
734 At 48 h after transfection, the cells were collected for IP with anti-GFP antibody and analyzed  
735 with anti-MYC and anti-GFP antibodies. (D) *pCS2-Myc-Cfap53* and *pRK-Flag-Ift20* were co-  
736 transfected into HEK293T cells. At 48 h after transfection, the cells were collected for IP with  
737 anti-MYC antibody and analyzed with anti-MYC and anti-FLAG antibodies. (E) Western blot  
738 analysis showing IFT88 and CCDC42 protein levels in *Cfap53*<sup>+/+</sup> and *Cfap53*<sup>-/-</sup> mouse testis  
739 lysates. GAPDH served as the loading control. (F) Quantification of the relative protein levels  
740 of IFT88 and CCDC42 using the Odyssey software and compared with the control group (n =  
741 3 independent experiments). Data are presented as the mean ± SD. The statistical significance  
742 of the differences between the mean values for the different genotypes was measured by  
743 Student's t-test with a paired, 2-tailed distribution. \*\**P* < 0.01 and \*\*\*\**P* < 0.0001. (G) The  
744 immunofluorescence analysis of IFT88 (green) and CFAP53 (red) was performed in testicular  
745 germ cells. The nucleus was stained with DAPI (blue). (H) Immunofluorescence staining with  
746 antibodies against IFT88 (red) and  $\alpha/\beta$ -tubulin (green) in spermatids at different developmental  
747 stages from *Cfap53*<sup>+/+</sup> and *Cfap53*<sup>-/-</sup> adult mice. The nucleus was stained with DAPI (blue).

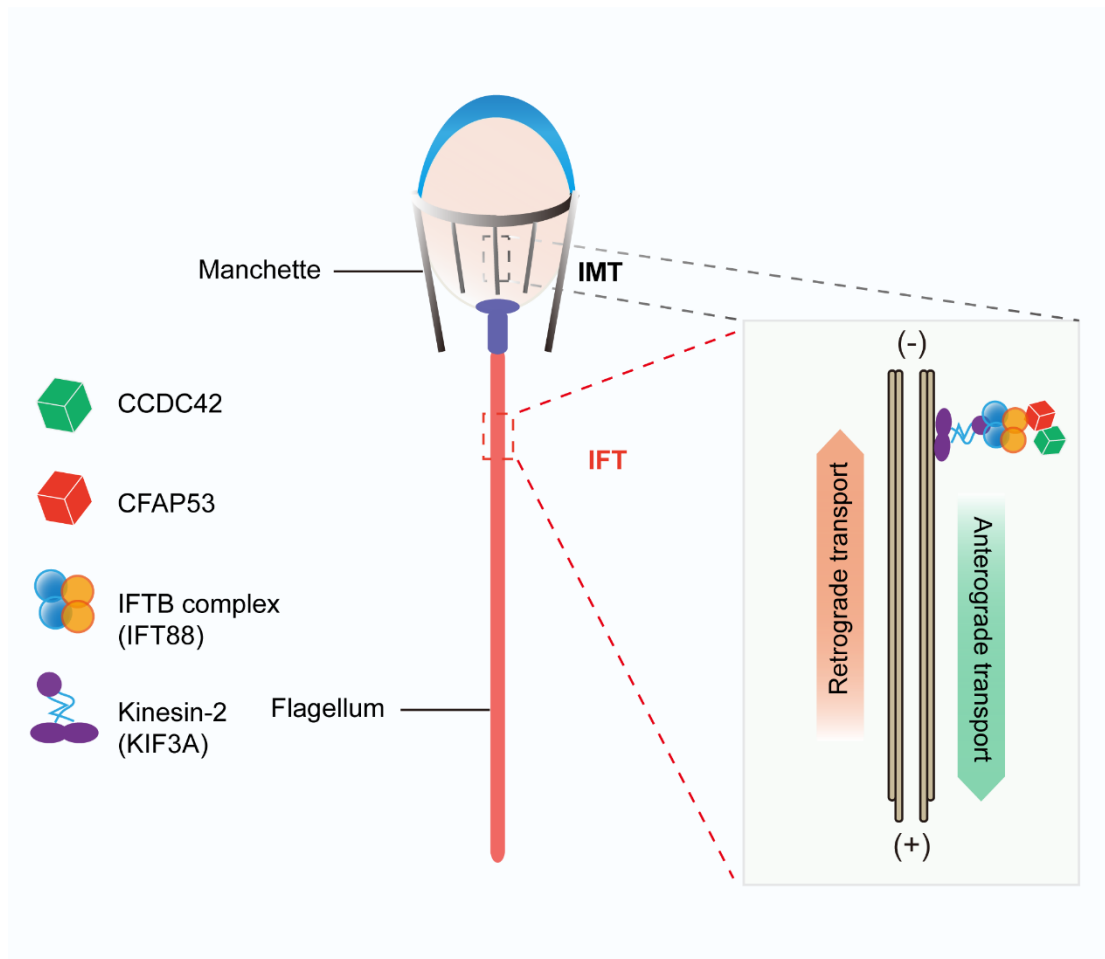

748

749 **Fig. 7. Proposed model for the functional role of CFAP53 during flagellum biogenesis.**

750 CFAP53 works as a cargo protein, and it is involved in the stabilization of other cargo proteins,

751 such as CCDC42, that need to be transported to the developing sperm tail. During transport,

752 CFAP53 interacts with IFT complex B member IFT88 and kinesin-2 motor subunit KIF3A for

753 targeting to its destination.

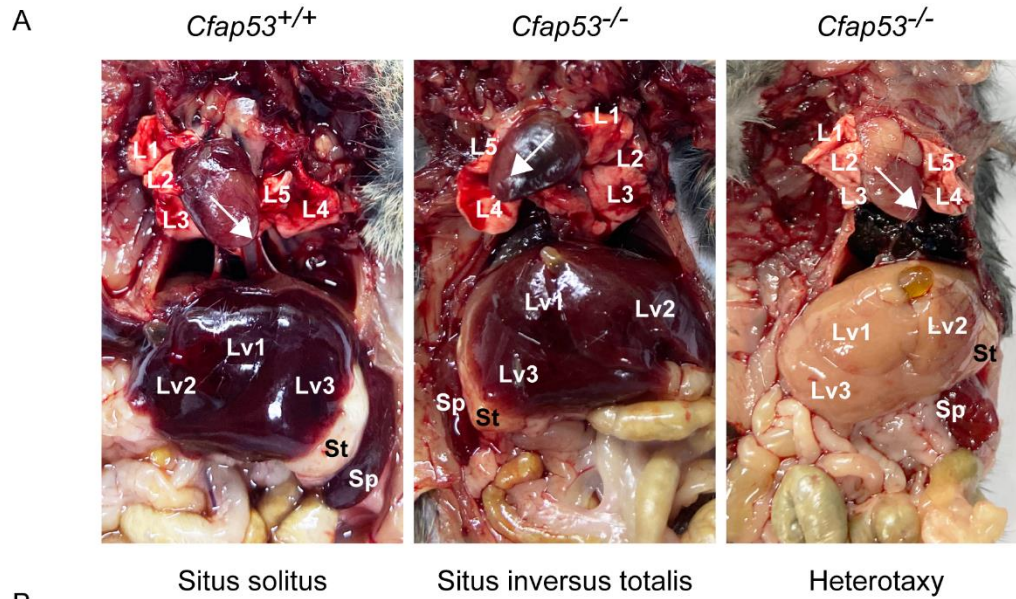

B

| ID | Brain         | Situs | Heart        | Liver    | Spleen   |
|----|---------------|-------|--------------|----------|----------|
| 1  | Hydrocephalus | SIT   | Dextrocardia | Inverted | Absent   |
| 2  | Hydrocephalus | SS    | Levocardia   | Normal   | Normal   |
| 3  | Hydrocephalus | SS    | Levocardia   | Normal   | Normal   |
| 4  | Hydrocephalus | SS    | Levocardia   | Normal   | Normal   |
| 5  | Hydrocephalus | SS    | Levocardia   | Normal   | Normal   |
| 6  | Hydrocephalus | SS    | Levocardia   | Normal   | Normal   |
| 7  | Normal        | SIT   | Dextrocardia | Inverted | Inverted |
| 8  | Hydrocephalus | SIT   | Dextrocardia | Inverted | Inverted |
| 9  | Hydrocephalus | SIT   | Dextrocardia | Inverted | Inverted |
| 10 | Normal        | SIT   | Dextrocardia | Inverted | Inverted |
| 11 | Normal        | SIA   | Levocardia   | Inverted | Split    |
| 12 | Normal        | SIA   | Levocardia   | Inverted | Inverted |
| 13 | Normal        | SIT   | Dextrocardia | Inverted | Absent   |
| 14 | Normal        | SIT   | Dextrocardia | Inverted | Inverted |
| 15 | Normal        | SIT   | Dextrocardia | Inverted | Inverted |
| 16 | Normal        | SIT   | Dextrocardia | Inverted | Inverted |
| 17 | Normal        | SIT   | Dextrocardia | Inverted | Inverted |
| 18 | Normal        | SIT   | Dextrocardia | Inverted | Inverted |
| 19 | Normal        | SIT   | Dextrocardia | Inverted | Inverted |

755 **Supplementary Figure 1. Left-right body asymmetry defects and hydrocephalus in**  
756 ***Cfap53*<sup>-/-</sup> mice.** (A) *Cfap53*<sup>-/-</sup> mice presented with situs inversus totalis (SIT), situs inversus  
757 abdominalis (SIA), and situs solitus (SS). L1-5 (white numbers): lung lobes, Lv1-3 (white  
758 numbers): liver lobes, St: stomach, Sp: spleen. (B) Summary of the phenotypes detected in  
759 *Cfap53*<sup>-/-</sup> mice.

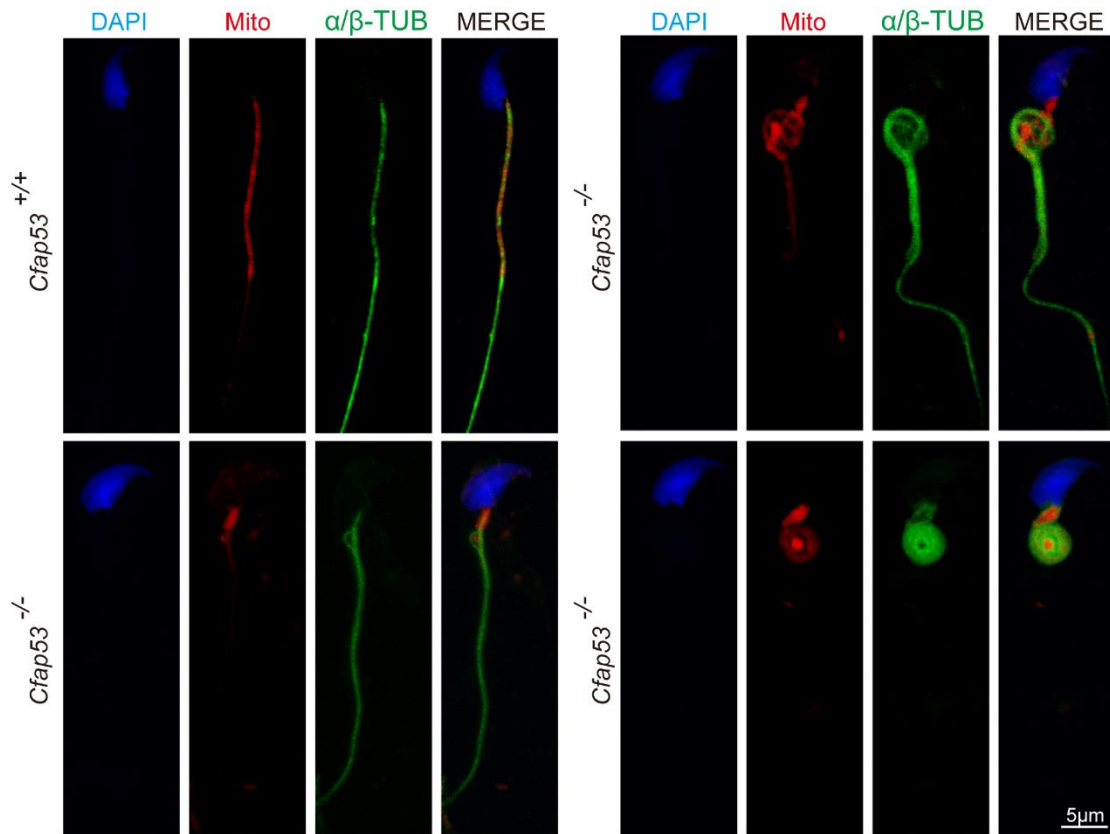

761 **Supplementary Figure 2. Mitochondrial sheath defects in *Cfap53*<sup>-/-</sup> spermatozoa.** The  
762 immunofluorescence analysis for  $\alpha/\beta$ -tubulin (green) and MitoTracker (red) was performed in  
763 *Cfap53*<sup>+/+</sup> and *Cfap53*<sup>-/-</sup> spermatozoa. The nucleus was stained with DAPI (blue).
